# Supplementary material for: Xylem systems genetics analysis reveals a key regulator of lignin biosynthesis in Populus deltoides
Source: HighWire-hosted journal article supplement (doi:10.1101/gr.261438.120), 2020-08-01
Supplement: Supplemental_Tables.xlsx [file Supplemental_Tables.xlsx]

## Sheet: Table S1
Xylem systems genetics analysis reveals a key regulator of lignin biosynthesis in Populus deltoides
Table S1 - GO enrichment of genes with H2>0.5
GO id	P-value (corrected)	Statistics	Description
GO:0012501	3.694e-07	26/172 | 578/14903	programmed cell death
GO:0006915	3.694e-07	26/172 | 578/14903	apoptotic process
GO:0008219	4.773e-07	26/172 | 605/14903	cell death
GO:0016265	4.773e-07	26/172 | 605/14903	death
GO:0008610	0.0001375	17/172 | 386/14903	lipid biosynthetic process
GO:0006629	0.01222	22/172 | 823/14903	lipid metabolic process
GO:0006545	0.01599	2/172 | 4/14903	glycine biosynthetic process
GO:0006231	0.01599	2/172 | 4/14903	dTMP biosynthetic process
GO:0009162	0.01599	2/172 | 4/14903	deoxyribonucleoside monophosphate metabolic process
GO:0009176	0.01599	2/172 | 4/14903	pyrimidine deoxyribonucleoside monophosphate metabolic process
GO:0009177	0.01599	2/172 | 4/14903	pyrimidine deoxyribonucleoside monophosphate biosynthetic process
GO:0009157	0.01599	2/172 | 4/14903	deoxyribonucleoside monophosphate biosynthetic process
GO:0046073	0.01599	2/172 | 4/14903	dTMP metabolic process
GO:0006694	0.01619	7/172 | 132/14903	steroid biosynthetic process
GO:0008202	0.01658	7/172 | 134/14903	steroid metabolic process
GO:0009221	0.01851	2/172 | 5/14903	pyrimidine deoxyribonucleotide biosynthetic process
GO:0046385	0.01851	2/172 | 5/14903	deoxyribose phosphate biosynthetic process
GO:0009263	0.01851	2/172 | 5/14903	deoxyribonucleotide biosynthetic process
GO:0009265	0.01851	2/172 | 5/14903	2'-deoxyribonucleotide biosynthetic process
GO:0044763	0.02661	55/172 | 3125/14903	single-organism cellular process
GO:0009129	0.04605	2/172 | 8/14903	pyrimidine nucleoside monophosphate metabolic process
GO:0009130	0.04605	2/172 | 8/14903	pyrimidine nucleoside monophosphate biosynthetic process

## Sheet: Table S2
Xylem systems genetics analysis reveals a key regulator of lignin biosynthesis in Populus deltoides
Table S2 - Genomic location of the SNPs
Genomic Feautures	WHOLE SET OF SNPS		TRANS		CIS - SAME GENE		CIS - OTHER GENE		CIS - TOTAL
	NUMBERS	%	NUMBERS	%	NUMBERS	%	NUMBERS	%	NUMBERS	%
EXON	34773	50.8697	1131	51.3857	1585	51.4945	1492	41.1246	3077	45.8843
5-UTR	6644	9.71956	204	9.26851	344	11.1761	358	9.8677	702	10.4682
INTERGENIC	2778	4.06396	93	4.22535	0	0	761	20.9757	761	11.348
INTRON	7293	10.669	227	10.3135	403	13.0929	356	9.81257	759	11.3182
PROMOTER	5925	8.66773	190	8.63244	185	6.0104	178	4.90628	363	5.41306
3-UTR	10944	16.0101	356	16.1745	561	18.2261	483	13.3131	1044	15.5681
TOTAL	68357	100	2201	100	3078	100	3628	100	6706	100

## Sheet: Table S3
Xylem systems genetics analysis reveals a key regulator of lignin biosynthesis in Populus deltoides
Table S3 - Genes present in the modules identified in the WGCNA analysis
Gene	Module	Lignin pathway
Potri.001G175000	Black	X
Potri.001G304800	Black	X
Potri.003G181400	Black	X
Potri.006G033300	Black	X
Potri.006G169700	Black	X
Potri.008G136600	Black	X
Potri.009G095800	Black	X
Potri.009G099800	Black	X
Potri.010G224100	Black	X
Potri.012G006400	Black	X
Potri.018G146100	Black	X
Potri.019G130700	Black	X
Potri.014G195800	Blue	X
Potri.001G042900	Green	X
Potri.006G107900	Green	X
Potri.001G104500	Magenta	X
Potri.016G135100	Magenta	X
Potri.001G036900	Red	X
Potri.003G059200	Red	X
Potri.003G183900	Red	X
Potri.003G188500	Red	X
Potri.005G117500	Red	X
Potri.007G016400	Red	X
Potri.008G038200	Red	X
Potri.013G157900	Red	X
Potri.004G064000	Tan	X
Potri.011G075500	Tan	X
Potri.009G063400	Turquoise	X
Potri.001G000700	Black
Potri.001G000900	Black
Potri.001G010600	Black
Potri.001G030100	Black
Potri.001G033600	Black
Potri.001G037400	Black
Potri.001G047100	Black
Potri.001G052100	Black
Potri.001G059800	Black
Potri.001G085400	Black
Potri.001G087200	Black
Potri.001G090300	Black
Potri.001G107000	Black
Potri.001G108700	Black
Potri.001G108800	Black
Potri.001G111700	Black
Potri.001G112000	Black
Potri.001G117900	Black
Potri.001G121900	Black
Potri.001G135100	Black
Potri.001G138000	Black
Potri.001G138400	Black
Potri.001G142100	Black
Potri.001G142600	Black
Potri.001G143600	Black
Potri.001G157800	Black
Potri.001G158900	Black
Potri.001G159300	Black
Potri.001G163100	Black
Potri.001G165600	Black
Potri.001G177000	Black
Potri.001G177400	Black
Potri.001G190400	Black
Potri.001G190800	Black
Potri.001G208800	Black
Potri.001G209400	Black
Potri.001G225200	Black
Potri.001G230900	Black
Potri.001G231000	Black
Potri.001G236100	Black
Potri.001G237200	Black
Potri.001G256300	Black
Potri.001G272700	Black
Potri.001G273000	Black
Potri.001G279500	Black
Potri.001G300700	Black
Potri.001G300900	Black
Potri.001G302000	Black
Potri.001G309500	Black
Potri.001G320500	Black
Potri.001G326600	Black
Potri.001G327300	Black
Potri.001G333300	Black
Potri.001G334100	Black
Potri.001G335100	Black
Potri.001G343500	Black
Potri.001G348500	Black
Potri.001G354700	Black
Potri.001G356100	Black
Potri.001G369300	Black
Potri.001G373000	Black
Potri.001G375700	Black
Potri.001G392200	Black
Potri.001G399900	Black
Potri.001G403600	Black
Potri.001G404500	Black
Potri.001G410700	Black
Potri.001G416600	Black
Potri.001G435400	Black
Potri.001G468700	Black
Potri.001G472000	Black
Potri.002G008600	Black
Potri.002G008800	Black
Potri.002G014500	Black
Potri.002G016500	Black
Potri.002G023000	Black
Potri.002G034400	Black
Potri.002G041700	Black
Potri.002G045000	Black
Potri.002G052800	Black
Potri.002G057700	Black
Potri.002G059600	Black
Potri.002G061900	Black
Potri.002G064800	Black
Potri.002G064900	Black
Potri.002G071900	Black
Potri.002G074400	Black
Potri.002G077900	Black
Potri.002G079600	Black
Potri.002G084900	Black
Potri.002G085300	Black
Potri.002G089300	Black
Potri.002G090700	Black
Potri.002G101200	Black
Potri.002G101300	Black
Potri.002G102800	Black
Potri.002G103800	Black
Potri.002G104200	Black
Potri.002G111800	Black
Potri.002G111900	Black
Potri.002G113300	Black
Potri.002G114700	Black
Potri.002G119800	Black
Potri.002G122000	Black
Potri.002G125800	Black
Potri.002G134200	Black
Potri.002G148900	Black
Potri.002G158500	Black
Potri.002G165400	Black
Potri.002G168300	Black
Potri.002G168400	Black
Potri.002G171500	Black
Potri.002G173200	Black
Potri.002G184900	Black
Potri.002G189000	Black
Potri.002G191400	Black
Potri.002G204000	Black
Potri.002G213600	Black
Potri.002G217000	Black
Potri.002G217200	Black
Potri.002G223300	Black
Potri.002G225800	Black
Potri.002G228900	Black
Potri.002G231800	Black
Potri.002G233400	Black
Potri.002G242500	Black
Potri.002G249400	Black
Potri.002G249600	Black
Potri.002G251600	Black
Potri.002G252600	Black
Potri.002G253500	Black
Potri.003G047700	Black
Potri.003G051300	Black
Potri.003G053400	Black
Potri.003G054800	Black
Potri.003G071500	Black
Potri.003G080100	Black
Potri.003G082500	Black
Potri.003G086700	Black
Potri.003G090300	Black
Potri.003G097400	Black
Potri.003G100200	Black
Potri.003G106600	Black
Potri.003G114100	Black
Potri.003G115000	Black
Potri.003G116500	Black
Potri.003G117100	Black
Potri.003G119400	Black
Potri.003G122900	Black
Potri.003G124400	Black
Potri.003G127100	Black
Potri.003G128600	Black
Potri.003G130700	Black
Potri.003G131600	Black
Potri.003G132400	Black
Potri.003G133400	Black
Potri.003G141100	Black
Potri.003G142600	Black
Potri.003G157100	Black
Potri.003G158200	Black
Potri.003G161900	Black
Potri.003G162800	Black
Potri.003G170800	Black
Potri.003G177700	Black
Potri.003G186400	Black
Potri.003G187500	Black
Potri.003G192900	Black
Potri.003G198200	Black
Potri.003G212400	Black
Potri.003G220300	Black
Potri.003G220900	Black
Potri.003G221000	Black
Potri.004G009600	Black
Potri.004G015700	Black
Potri.004G028900	Black
Potri.004G029600	Black
Potri.004G040100	Black
Potri.004G048200	Black
Potri.004G049000	Black
Potri.004G054300	Black
Potri.004G055000	Black
Potri.004G062500	Black
Potri.004G069600	Black
Potri.004G075800	Black
Potri.004G093100	Black
Potri.004G097500	Black
Potri.004G126600	Black
Potri.004G129900	Black
Potri.004G137200	Black
Potri.004G138000	Black
Potri.004G163400	Black
Potri.004G173800	Black
Potri.004G174400	Black
Potri.004G175400	Black
Potri.004G186900	Black
Potri.004G200500	Black
Potri.004G201600	Black
Potri.004G211000	Black
Potri.004G211400	Black
Potri.004G211800	Black
Potri.004G218200	Black
Potri.004G219100	Black
Potri.004G223300	Black
Potri.004G226800	Black
Potri.005G012000	Black
Potri.005G020400	Black
Potri.005G021200	Black
Potri.005G038800	Black
Potri.005G045500	Black
Potri.005G074100	Black
Potri.005G075900	Black
Potri.005G078900	Black
Potri.005G083000	Black
Potri.005G093900	Black
Potri.005G102000	Black
Potri.005G108000	Black
Potri.005G109400	Black
Potri.005G109600	Black
Potri.005G110900	Black
Potri.005G114500	Black
Potri.005G126500	Black
Potri.005G144600	Black
Potri.005G148800	Black
Potri.005G157500	Black
Potri.005G162800	Black
Potri.005G176500	Black
Potri.005G178200	Black
Potri.005G184700	Black
Potri.005G199600	Black
Potri.005G205300	Black
Potri.005G206800	Black
Potri.005G211000	Black
Potri.005G226400	Black
Potri.005G226600	Black
Potri.005G237100	Black
Potri.005G241200	Black
Potri.005G244500	Black
Potri.005G245600	Black
Potri.005G250800	Black
Potri.005G253700	Black
Potri.005G257800	Black
Potri.005G260000	Black
Potri.006G000300	Black
Potri.006G001500	Black
Potri.006G011600	Black
Potri.006G025800	Black
Potri.006G026500	Black
Potri.006G036200	Black
Potri.006G051500	Black
Potri.006G055400	Black
Potri.006G056100	Black
Potri.006G060700	Black
Potri.006G067000	Black
Potri.006G069700	Black
Potri.006G072300	Black
Potri.006G077900	Black
Potri.006G090100	Black
Potri.006G090300	Black
Potri.006G096900	Black
Potri.006G099600	Black
Potri.006G107300	Black
Potri.006G119400	Black
Potri.006G125300	Black
Potri.006G129200	Black
Potri.006G135800	Black
Potri.006G136700	Black
Potri.006G137700	Black
Potri.006G140700	Black
Potri.006G187400	Black
Potri.006G188100	Black
Potri.006G193500	Black
Potri.006G201600	Black
Potri.006G204400	Black
Potri.006G217000	Black
Potri.006G218400	Black
Potri.006G226900	Black
Potri.006G232700	Black
Potri.006G232900	Black
Potri.006G233300	Black
Potri.006G237100	Black
Potri.006G240200	Black
Potri.006G246600	Black
Potri.006G248700	Black
Potri.006G255200	Black
Potri.006G258600	Black
Potri.006G265800	Black
Potri.006G278100	Black
Potri.006G279600	Black
Potri.007G006400	Black
Potri.007G006900	Black
Potri.007G008600	Black
Potri.007G011000	Black
Potri.007G011700	Black
Potri.007G017900	Black
Potri.007G020600	Black
Potri.007G043500	Black
Potri.007G047500	Black
Potri.007G051000	Black
Potri.007G051100	Black
Potri.007G058400	Black
Potri.007G063000	Black
Potri.007G065800	Black
Potri.007G067800	Black
Potri.007G070900	Black
Potri.007G078500	Black
Potri.007G092700	Black
Potri.007G097600	Black
Potri.007G116400	Black
Potri.007G121500	Black
Potri.007G122600	Black
Potri.007G124000	Black
Potri.007G129700	Black
Potri.007G129900	Black
Potri.007G139800	Black
Potri.008G002300	Black
Potri.008G007000	Black
Potri.008G017800	Black
Potri.008G020100	Black
Potri.008G025300	Black
Potri.008G028800	Black
Potri.008G029600	Black
Potri.008G041800	Black
Potri.008G065200	Black
Potri.008G073200	Black
Potri.008G083900	Black
Potri.008G092500	Black
Potri.008G099300	Black
Potri.008G099400	Black
Potri.008G103500	Black
Potri.008G115700	Black
Potri.008G128000	Black
Potri.008G134300	Black
Potri.008G134900	Black
Potri.008G142800	Black
Potri.008G144600	Black
Potri.008G148300	Black
Potri.008G152200	Black
Potri.008G158300	Black
Potri.008G161200	Black
Potri.008G167800	Black
Potri.008G172400	Black
Potri.008G202300	Black
Potri.008G204800	Black
Potri.008G208200	Black
Potri.008G226200	Black
Potri.009G013500	Black
Potri.009G018900	Black
Potri.009G021800	Black
Potri.009G026000	Black
Potri.009G028000	Black
Potri.009G030100	Black
Potri.009G034700	Black
Potri.009G047300	Black
Potri.009G051800	Black
Potri.009G062700	Black
Potri.009G067200	Black
Potri.009G069500	Black
Potri.009G074300	Black
Potri.009G079600	Black
Potri.009G085100	Black
Potri.009G115600	Black
Potri.009G119700	Black
Potri.009G129500	Black
Potri.009G134000	Black
Potri.009G134600	Black
Potri.009G135300	Black
Potri.009G152800	Black
Potri.009G161400	Black
Potri.009G164600	Black
Potri.009G168800	Black
Potri.009G169800	Black
Potri.010G003600	Black
Potri.010G015100	Black
Potri.010G022300	Black
Potri.010G028700	Black
Potri.010G028800	Black
Potri.010G028900	Black
Potri.010G031600	Black
Potri.010G033400	Black
Potri.010G038400	Black
Potri.010G056600	Black
Potri.010G058700	Black
Potri.010G065900	Black
Potri.010G076500	Black
Potri.010G088200	Black
Potri.010G093200	Black
Potri.010G097900	Black
Potri.010G098300	Black
Potri.010G101400	Black
Potri.010G105900	Black
Potri.010G122300	Black
Potri.010G127500	Black
Potri.010G146900	Black
Potri.010G147400	Black
Potri.010G153400	Black
Potri.010G157600	Black
Potri.010G159300	Black
Potri.010G162400	Black
Potri.010G169200	Black
Potri.010G172400	Black
Potri.010G175000	Black
Potri.010G191100	Black
Potri.010G205000	Black
Potri.010G205100	Black
Potri.010G209400	Black
Potri.010G211900	Black
Potri.010G216600	Black
Potri.010G224300	Black
Potri.010G229600	Black
Potri.010G231000	Black
Potri.010G236700	Black
Potri.010G241800	Black
Potri.010G242700	Black
Potri.010G249900	Black
Potri.011G001600	Black
Potri.011G007100	Black
Potri.011G007200	Black
Potri.011G011100	Black
Potri.011G015600	Black
Potri.011G023200	Black
Potri.011G041100	Black
Potri.011G043800	Black
Potri.011G057200	Black
Potri.011G057400	Black
Potri.011G058100	Black
Potri.011G061500	Black
Potri.011G066100	Black
Potri.011G071900	Black
Potri.011G111700	Black
Potri.011G122700	Black
Potri.011G129900	Black
Potri.011G132500	Black
Potri.011G143400	Black
Potri.011G149200	Black
Potri.011G166300	Black
Potri.011G167000	Black
Potri.012G006500	Black
Potri.012G015500	Black
Potri.012G016000	Black
Potri.012G032000	Black
Potri.012G032200	Black
Potri.012G034400	Black
Potri.012G036600	Black
Potri.012G071700	Black
Potri.012G080700	Black
Potri.012G082200	Black
Potri.012G103100	Black
Potri.012G109200	Black
Potri.012G111500	Black
Potri.012G117800	Black
Potri.012G119600	Black
Potri.012G123700	Black
Potri.012G127300	Black
Potri.012G127700	Black
Potri.012G139100	Black
Potri.012G140800	Black
Potri.012G142400	Black
Potri.013G004100	Black
Potri.013G004400	Black
Potri.013G007700	Black
Potri.013G010500	Black
Potri.013G023400	Black
Potri.013G031700	Black
Potri.013G035500	Black
Potri.013G043700	Black
Potri.013G047200	Black
Potri.013G049200	Black
Potri.013G050900	Black
Potri.013G060600	Black
Potri.013G061800	Black
Potri.013G067300	Black
Potri.013G072300	Black
Potri.013G072600	Black
Potri.013G078600	Black
Potri.013G081200	Black
Potri.013G083800	Black
Potri.013G086600	Black
Potri.013G106000	Black
Potri.013G113500	Black
Potri.013G114000	Black
Potri.013G117900	Black
Potri.013G123800	Black
Potri.013G135200	Black
Potri.013G155300	Black
Potri.014G015600	Black
Potri.014G017600	Black
Potri.014G022600	Black
Potri.014G029300	Black
Potri.014G043200	Black
Potri.014G049400	Black
Potri.014G067400	Black
Potri.014G069200	Black
Potri.014G077900	Black
Potri.014G079000	Black
Potri.014G091200	Black
Potri.014G091300	Black
Potri.014G096000	Black
Potri.014G096100	Black
Potri.014G099000	Black
Potri.014G099200	Black
Potri.014G100400	Black
Potri.014G108600	Black
Potri.014G114700	Black
Potri.014G124900	Black
Potri.014G128500	Black
Potri.014G131600	Black
Potri.014G138800	Black
Potri.014G139900	Black
Potri.014G147000	Black
Potri.014G149900	Black
Potri.014G153900	Black
Potri.014G160400	Black
Potri.014G164400	Black
Potri.014G175100	Black
Potri.014G182000	Black
Potri.014G189500	Black
Potri.015G009200	Black
Potri.015G013000	Black
Potri.015G029200	Black
Potri.015G034700	Black
Potri.015G036800	Black
Potri.015G092800	Black
Potri.015G095100	Black
Potri.015G097400	Black
Potri.015G101200	Black
Potri.015G103400	Black
Potri.015G121000	Black
Potri.015G122500	Black
Potri.015G124800	Black
Potri.015G125100	Black
Potri.015G128600	Black
Potri.015G129100	Black
Potri.015G132700	Black
Potri.015G140900	Black
Potri.015G143600	Black
Potri.015G147000	Black
Potri.016G002700	Black
Potri.016G006400	Black
Potri.016G007100	Black
Potri.016G010900	Black
Potri.016G013000	Black
Potri.016G013400	Black
Potri.016G024800	Black
Potri.016G041000	Black
Potri.016G041600	Black
Potri.016G045300	Black
Potri.016G052100	Black
Potri.016G056500	Black
Potri.016G071700	Black
Potri.016G087000	Black
Potri.016G097800	Black
Potri.016G098100	Black
Potri.016G098400	Black
Potri.016G099300	Black
Potri.016G101900	Black
Potri.016G104300	Black
Potri.016G110200	Black
Potri.016G110600	Black
Potri.016G110900	Black
Potri.016G113600	Black
Potri.016G115300	Black
Potri.016G126200	Black
Potri.016G129900	Black
Potri.016G143200	Black
Potri.016G144000	Black
Potri.017G000300	Black
Potri.017G028500	Black
Potri.017G029000	Black
Potri.017G036000	Black
Potri.017G036300	Black
Potri.017G038100	Black
Potri.017G043200	Black
Potri.017G050700	Black
Potri.017G054000	Black
Potri.017G059300	Black
Potri.017G059400	Black
Potri.017G059500	Black
Potri.017G075600	Black
Potri.017G076500	Black
Potri.017G088700	Black
Potri.017G097000	Black
Potri.017G100100	Black
Potri.017G125200	Black
Potri.017G148100	Black
Potri.017G154200	Black
Potri.018G000600	Black
Potri.018G014300	Black
Potri.018G019900	Black
Potri.018G022400	Black
Potri.018G026200	Black
Potri.018G031900	Black
Potri.018G032100	Black
Potri.018G032600	Black
Potri.018G056900	Black
Potri.018G064500	Black
Potri.018G067700	Black
Potri.018G083700	Black
Potri.018G084100	Black
Potri.018G090100	Black
Potri.018G108700	Black
Potri.018G115100	Black
Potri.018G125400	Black
Potri.018G127200	Black
Potri.018G127300	Black
Potri.018G132400	Black
Potri.018G139200	Black
Potri.018G143500	Black
Potri.018G149400	Black
Potri.019G007500	Black
Potri.019G009900	Black
Potri.019G010400	Black
Potri.019G014200	Black
Potri.019G032900	Black
Potri.019G036700	Black
Potri.019G037900	Black
Potri.019G039500	Black
Potri.019G053300	Black
Potri.019G053800	Black
Potri.019G064100	Black
Potri.019G077100	Black
Potri.019G079800	Black
Potri.019G079900	Black
Potri.019G101800	Black
Potri.019G104500	Black
Potri.019G126300	Black
Potri.019G130000	Black
Potri.T011400	Black
Potri.T045400	Black
Potri.T058500	Black
Potri.T059900	Black
Potri.T070100	Black
Potri.T138300	Black
Potri.T153900	Black
XLOC_010176	Black
XLOC_023279	Black
XLOC_035744	Black
XLOC_047850	Black
XLOC_054071	Black
XLOC_063378	Black
XLOC_064046	Black
XLOC_065058	Black
XLOC_078442	Black
XLOC_086912	Black
XLOC_087698	Black
Potri.001G003900	Blue
Potri.001G004200	Blue
Potri.001G004800	Blue
Potri.001G007900	Blue
Potri.001G008700	Blue
Potri.001G008800	Blue
Potri.001G011800	Blue
Potri.001G012300	Blue
Potri.001G013800	Blue
Potri.001G019000	Blue
Potri.001G021500	Blue
Potri.001G026800	Blue
Potri.001G027600	Blue
Potri.001G029600	Blue
Potri.001G031400	Blue
Potri.001G033900	Blue
Potri.001G034700	Blue
Potri.001G035500	Blue
Potri.001G036100	Blue
Potri.001G043200	Blue
Potri.001G047200	Blue
Potri.001G049100	Blue
Potri.001G049200	Blue
Potri.001G050000	Blue
Potri.001G053400	Blue
Potri.001G057400	Blue
Potri.001G057800	Blue
Potri.001G067300	Blue
Potri.001G068900	Blue
Potri.001G072000	Blue
Potri.001G073300	Blue
Potri.001G074200	Blue
Potri.001G081600	Blue
Potri.001G081900	Blue
Potri.001G085500	Blue
Potri.001G088600	Blue
Potri.001G089900	Blue
Potri.001G091800	Blue
Potri.001G094400	Blue
Potri.001G094500	Blue
Potri.001G097200	Blue
Potri.001G097400	Blue
Potri.001G097500	Blue
Potri.001G097600	Blue
Potri.001G100300	Blue
Potri.001G101300	Blue
Potri.001G102900	Blue
Potri.001G104700	Blue
Potri.001G105800	Blue
Potri.001G108400	Blue
Potri.001G112300	Blue
Potri.001G115800	Blue
Potri.001G116900	Blue
Potri.001G117400	Blue
Potri.001G118300	Blue
Potri.001G121200	Blue
Potri.001G123600	Blue
Potri.001G123800	Blue
Potri.001G124000	Blue
Potri.001G124300	Blue
Potri.001G126400	Blue
Potri.001G129000	Blue
Potri.001G130900	Blue
Potri.001G135300	Blue
Potri.001G136000	Blue
Potri.001G137200	Blue
Potri.001G138900	Blue
Potri.001G143400	Blue
Potri.001G145400	Blue
Potri.001G148100	Blue
Potri.001G148800	Blue
Potri.001G155200	Blue
Potri.001G157300	Blue
Potri.001G159400	Blue
Potri.001G160700	Blue
Potri.001G161000	Blue
Potri.001G161100	Blue
Potri.001G165800	Blue
Potri.001G166400	Blue
Potri.001G167200	Blue
Potri.001G169900	Blue
Potri.001G170200	Blue
Potri.001G170500	Blue
Potri.001G170700	Blue
Potri.001G171100	Blue
Potri.001G173900	Blue
Potri.001G174000	Blue
Potri.001G177700	Blue
Potri.001G179600	Blue
Potri.001G186900	Blue
Potri.001G187000	Blue
Potri.001G189100	Blue
Potri.001G191300	Blue
Potri.001G195600	Blue
Potri.001G196600	Blue
Potri.001G198000	Blue
Potri.001G199200	Blue
Potri.001G199600	Blue
Potri.001G200500	Blue
Potri.001G201000	Blue
Potri.001G201600	Blue
Potri.001G201900	Blue
Potri.001G204900	Blue
Potri.001G205500	Blue
Potri.001G206100	Blue
Potri.001G207200	Blue
Potri.001G207700	Blue
Potri.001G208900	Blue
Potri.001G209500	Blue
Potri.001G210600	Blue
Potri.001G211200	Blue
Potri.001G212000	Blue
Potri.001G213800	Blue
Potri.001G213900	Blue
Potri.001G215200	Blue
Potri.001G215700	Blue
Potri.001G217800	Blue
Potri.001G220100	Blue
Potri.001G220600	Blue
Potri.001G220700	Blue
Potri.001G229000	Blue
Potri.001G229100	Blue
Potri.001G230000	Blue
Potri.001G231800	Blue
Potri.001G233800	Blue
Potri.001G233900	Blue
Potri.001G234300	Blue
Potri.001G235500	Blue
Potri.001G237100	Blue
Potri.001G241600	Blue
Potri.001G241700	Blue
Potri.001G243400	Blue
Potri.001G244300	Blue
Potri.001G244400	Blue
Potri.001G245500	Blue
Potri.001G246200	Blue
Potri.001G247000	Blue
Potri.001G249100	Blue
Potri.001G252500	Blue
Potri.001G253400	Blue
Potri.001G255000	Blue
Potri.001G258000	Blue
Potri.001G259000	Blue
Potri.001G261300	Blue
Potri.001G264100	Blue
Potri.001G264800	Blue
Potri.001G266200	Blue
Potri.001G266700	Blue
Potri.001G269200	Blue
Potri.001G271800	Blue
Potri.001G273600	Blue
Potri.001G274900	Blue
Potri.001G275300	Blue
Potri.001G275400	Blue
Potri.001G276800	Blue
Potri.001G279100	Blue
Potri.001G286600	Blue
Potri.001G287900	Blue
Potri.001G289200	Blue
Potri.001G293900	Blue
Potri.001G294400	Blue
Potri.001G298400	Blue
Potri.001G298700	Blue
Potri.001G304100	Blue
Potri.001G304900	Blue
Potri.001G305300	Blue
Potri.001G310900	Blue
Potri.001G312900	Blue
Potri.001G317200	Blue
Potri.001G317500	Blue
Potri.001G319000	Blue
Potri.001G319600	Blue
Potri.001G322500	Blue
Potri.001G324400	Blue
Potri.001G326500	Blue
Potri.001G326700	Blue
Potri.001G327100	Blue
Potri.001G330800	Blue
Potri.001G331400	Blue
Potri.001G334200	Blue
Potri.001G335000	Blue
Potri.001G337200	Blue
Potri.001G337300	Blue
Potri.001G337600	Blue
Potri.001G338900	Blue
Potri.001G342300	Blue
Potri.001G345100	Blue
Potri.001G345200	Blue
Potri.001G345300	Blue
Potri.001G345500	Blue
Potri.001G346000	Blue
Potri.001G346200	Blue
Potri.001G347000	Blue
Potri.001G347100	Blue
Potri.001G349300	Blue
Potri.001G350200	Blue
Potri.001G350400	Blue
Potri.001G351800	Blue
Potri.001G353000	Blue
Potri.001G353700	Blue
Potri.001G355300	Blue
Potri.001G356700	Blue
Potri.001G356800	Blue
Potri.001G357600	Blue
Potri.001G357700	Blue
Potri.001G357900	Blue
Potri.001G358900	Blue
Potri.001G359400	Blue
Potri.001G359700	Blue
Potri.001G361200	Blue
Potri.001G365800	Blue
Potri.001G368600	Blue
Potri.001G368800	Blue
Potri.001G370300	Blue
Potri.001G370900	Blue
Potri.001G373700	Blue
Potri.001G374100	Blue
Potri.001G378900	Blue
Potri.001G379100	Blue
Potri.001G383800	Blue
Potri.001G387100	Blue
Potri.001G394000	Blue
Potri.001G394600	Blue
Potri.001G397600	Blue
Potri.001G398300	Blue
Potri.001G400300	Blue
Potri.001G400900	Blue
Potri.001G402800	Blue
Potri.001G408800	Blue
Potri.001G412200	Blue
Potri.001G417000	Blue
Potri.001G435500	Blue
Potri.001G436300	Blue
Potri.001G438300	Blue
Potri.001G438900	Blue
Potri.001G439600	Blue
Potri.001G446400	Blue
Potri.001G448900	Blue
Potri.001G449000	Blue
Potri.001G450900	Blue
Potri.001G453200	Blue
Potri.001G455600	Blue
Potri.001G456500	Blue
Potri.001G457600	Blue
Potri.001G457800	Blue
Potri.001G466800	Blue
Potri.001G467300	Blue
Potri.001G467800	Blue
Potri.001G469500	Blue
Potri.001G469800	Blue
Potri.001G470600	Blue
Potri.001G471800	Blue
Potri.001G472400	Blue
Potri.001G472600	Blue
Potri.001G473100	Blue
Potri.002G000100	Blue
Potri.002G000200	Blue
Potri.002G000800	Blue
Potri.002G001000	Blue
Potri.002G001700	Blue
Potri.002G001900	Blue
Potri.002G002400	Blue
Potri.002G003000	Blue
Potri.002G003600	Blue
Potri.002G005600	Blue
Potri.002G013500	Blue
Potri.002G016200	Blue
Potri.002G020000	Blue
Potri.002G032600	Blue
Potri.002G032900	Blue
Potri.002G037300	Blue
Potri.002G044100	Blue
Potri.002G045900	Blue
Potri.002G046300	Blue
Potri.002G048300	Blue
Potri.002G048500	Blue
Potri.002G050900	Blue
Potri.002G051800	Blue
Potri.002G052300	Blue
Potri.002G054000	Blue
Potri.002G057300	Blue
Potri.002G059800	Blue
Potri.002G064400	Blue
Potri.002G068600	Blue
Potri.002G068700	Blue
Potri.002G069100	Blue
Potri.002G072900	Blue
Potri.002G073200	Blue
Potri.002G075500	Blue
Potri.002G080600	Blue
Potri.002G085000	Blue
Potri.002G085500	Blue
Potri.002G088900	Blue
Potri.002G089000	Blue
Potri.002G089100	Blue
Potri.002G089400	Blue
Potri.002G091300	Blue
Potri.002G093500	Blue
Potri.002G094900	Blue
Potri.002G096900	Blue
Potri.002G097800	Blue
Potri.002G099900	Blue
Potri.002G102700	Blue
Potri.002G104800	Blue
Potri.002G105700	Blue
Potri.002G106500	Blue
Potri.002G109000	Blue
Potri.002G110500	Blue
Potri.002G110700	Blue
Potri.002G110900	Blue
Potri.002G111000	Blue
Potri.002G111700	Blue
Potri.002G112200	Blue
Potri.002G112300	Blue
Potri.002G112600	Blue
Potri.002G117400	Blue
Potri.002G119900	Blue
Potri.002G121000	Blue
Potri.002G123100	Blue
Potri.002G124200	Blue
Potri.002G124300	Blue
Potri.002G125400	Blue
Potri.002G129000	Blue
Potri.002G130300	Blue
Potri.002G131400	Blue
Potri.002G132700	Blue
Potri.002G137100	Blue
Potri.002G137600	Blue
Potri.002G139700	Blue
Potri.002G139900	Blue
Potri.002G140000	Blue
Potri.002G141300	Blue
Potri.002G142700	Blue
Potri.002G143000	Blue
Potri.002G143200	Blue
Potri.002G145000	Blue
Potri.002G147300	Blue
Potri.002G149200	Blue
Potri.002G149400	Blue
Potri.002G149800	Blue
Potri.002G150700	Blue
Potri.002G151600	Blue
Potri.002G152100	Blue
Potri.002G159300	Blue
Potri.002G159900	Blue
Potri.002G160000	Blue
Potri.002G160900	Blue
Potri.002G161100	Blue
Potri.002G162000	Blue
Potri.002G163000	Blue
Potri.002G163100	Blue
Potri.002G164100	Blue
Potri.002G166500	Blue
Potri.002G169900	Blue
Potri.002G172800	Blue
Potri.002G173300	Blue
Potri.002G175800	Blue
Potri.002G176100	Blue
Potri.002G177100	Blue
Potri.002G179300	Blue
Potri.002G182700	Blue
Potri.002G183700	Blue
Potri.002G184400	Blue
Potri.002G185000	Blue
Potri.002G187100	Blue
Potri.002G187200	Blue
Potri.002G187500	Blue
Potri.002G187900	Blue
Potri.002G188700	Blue
Potri.002G189700	Blue
Potri.002G192300	Blue
Potri.002G192800	Blue
Potri.002G192900	Blue
Potri.002G194000	Blue
Potri.002G195700	Blue
Potri.002G199300	Blue
Potri.002G200900	Blue
Potri.002G201400	Blue
Potri.002G205900	Blue
Potri.002G206200	Blue
Potri.002G207200	Blue
Potri.002G209900	Blue
Potri.002G213300	Blue
Potri.002G213400	Blue
Potri.002G215600	Blue
Potri.002G216900	Blue
Potri.002G220700	Blue
Potri.002G221600	Blue
Potri.002G223600	Blue
Potri.002G230800	Blue
Potri.002G234500	Blue
Potri.002G235700	Blue
Potri.002G237800	Blue
Potri.002G241200	Blue
Potri.002G241800	Blue
Potri.002G243400	Blue
Potri.002G248100	Blue
Potri.002G252800	Blue
Potri.002G254700	Blue
Potri.002G255400	Blue
Potri.002G255800	Blue
Potri.002G257100	Blue
Potri.002G257400	Blue
Potri.002G259300	Blue
Potri.002G261500	Blue
Potri.002G262300	Blue
Potri.002G263600	Blue
Potri.003G001000	Blue
Potri.003G005700	Blue
Potri.003G005900	Blue
Potri.003G008800	Blue
Potri.003G012400	Blue
Potri.003G019600	Blue
Potri.003G022100	Blue
Potri.003G023000	Blue
Potri.003G023300	Blue
Potri.003G023700	Blue
Potri.003G029600	Blue
Potri.003G030000	Blue
Potri.003G031000	Blue
Potri.003G031400	Blue
Potri.003G031700	Blue
Potri.003G031800	Blue
Potri.003G031900	Blue
Potri.003G033100	Blue
Potri.003G033200	Blue
Potri.003G033300	Blue
Potri.003G034200	Blue
Potri.003G040800	Blue
Potri.003G043300	Blue
Potri.003G043500	Blue
Potri.003G043900	Blue
Potri.003G047600	Blue
Potri.003G048600	Blue
Potri.003G048900	Blue
Potri.003G050600	Blue
Potri.003G053200	Blue
Potri.003G056000	Blue
Potri.003G056700	Blue
Potri.003G059300	Blue
Potri.003G059400	Blue
Potri.003G063300	Blue
Potri.003G064000	Blue
Potri.003G067000	Blue
Potri.003G067900	Blue
Potri.003G069200	Blue
Potri.003G074000	Blue
Potri.003G074200	Blue
Potri.003G076500	Blue
Potri.003G077600	Blue
Potri.003G080000	Blue
Potri.003G086400	Blue
Potri.003G090000	Blue
Potri.003G094500	Blue
Potri.003G096600	Blue
Potri.003G099800	Blue
Potri.003G100600	Blue
Potri.003G102700	Blue
Potri.003G103600	Blue
Potri.003G103800	Blue
Potri.003G104300	Blue
Potri.003G105000	Blue
Potri.003G106500	Blue
Potri.003G107200	Blue
Potri.003G107700	Blue
Potri.003G109700	Blue
Potri.003G109900	Blue
Potri.003G110000	Blue
Potri.003G113300	Blue
Potri.003G114600	Blue
Potri.003G115500	Blue
Potri.003G115600	Blue
Potri.003G115800	Blue
Potri.003G117300	Blue
Potri.003G119800	Blue
Potri.003G121600	Blue
Potri.003G124200	Blue
Potri.003G126600	Blue
Potri.003G126700	Blue
Potri.003G128000	Blue
Potri.003G128500	Blue
Potri.003G129800	Blue
Potri.003G133000	Blue
Potri.003G133800	Blue
Potri.003G133900	Blue
Potri.003G134200	Blue
Potri.003G135300	Blue
Potri.003G137100	Blue
Potri.003G137400	Blue
Potri.003G137700	Blue
Potri.003G142100	Blue
Potri.003G144400	Blue
Potri.003G146000	Blue
Potri.003G149600	Blue
Potri.003G151300	Blue
Potri.003G152600	Blue
Potri.003G157800	Blue
Potri.003G161400	Blue
Potri.003G163200	Blue
Potri.003G163600	Blue
Potri.003G164300	Blue
Potri.003G166300	Blue
Potri.003G168000	Blue
Potri.003G170600	Blue
Potri.003G171000	Blue
Potri.003G172600	Blue
Potri.003G173700	Blue
Potri.003G174900	Blue
Potri.003G178000	Blue
Potri.003G180000	Blue
Potri.003G180100	Blue
Potri.003G181000	Blue
Potri.003G183600	Blue
Potri.003G184100	Blue
Potri.003G189500	Blue
Potri.003G193000	Blue
Potri.003G196200	Blue
Potri.003G198700	Blue
Potri.003G201400	Blue
Potri.003G202100	Blue
Potri.003G202800	Blue
Potri.003G203000	Blue
Potri.003G204300	Blue
Potri.003G204900	Blue
Potri.003G212300	Blue
Potri.003G214400	Blue
Potri.003G215700	Blue
Potri.003G216800	Blue
Potri.003G217700	Blue
Potri.003G220800	Blue
Potri.003G221100	Blue
Potri.003G223000	Blue
Potri.003G223400	Blue
Potri.004G002600	Blue
Potri.004G004400	Blue
Potri.004G013900	Blue
Potri.004G014100	Blue
Potri.004G019300	Blue
Potri.004G019400	Blue
Potri.004G020300	Blue
Potri.004G038800	Blue
Potri.004G039500	Blue
Potri.004G040000	Blue
Potri.004G040300	Blue
Potri.004G041600	Blue
Potri.004G043200	Blue
Potri.004G048700	Blue
Potri.004G049400	Blue
Potri.004G052300	Blue
Potri.004G055600	Blue
Potri.004G058700	Blue
Potri.004G059000	Blue
Potri.004G061200	Blue
Potri.004G065800	Blue
Potri.004G066100	Blue
Potri.004G068700	Blue
Potri.004G070200	Blue
Potri.004G072200	Blue
Potri.004G072400	Blue
Potri.004G073300	Blue
Potri.004G077800	Blue
Potri.004G079000	Blue
Potri.004G081800	Blue
Potri.004G083200	Blue
Potri.004G087400	Blue
Potri.004G089800	Blue
Potri.004G091000	Blue
Potri.004G091800	Blue
Potri.004G092400	Blue
Potri.004G101200	Blue
Potri.004G102400	Blue
Potri.004G104200	Blue
Potri.004G104400	Blue
Potri.004G111500	Blue
Potri.004G112400	Blue
Potri.004G113700	Blue
Potri.004G120500	Blue
Potri.004G129200	Blue
Potri.004G130400	Blue
Potri.004G130600	Blue
Potri.004G133600	Blue
Potri.004G134400	Blue
Potri.004G135800	Blue
Potri.004G136100	Blue
Potri.004G137000	Blue
Potri.004G137100	Blue
Potri.004G137900	Blue
Potri.004G140600	Blue
Potri.004G141700	Blue
Potri.004G141800	Blue
Potri.004G142000	Blue
Potri.004G143700	Blue
Potri.004G153300	Blue
Potri.004G155000	Blue
Potri.004G157000	Blue
Potri.004G160000	Blue
Potri.004G161700	Blue
Potri.004G162500	Blue
Potri.004G162600	Blue
Potri.004G164000	Blue
Potri.004G164500	Blue
Potri.004G171600	Blue
Potri.004G173600	Blue
Potri.004G174700	Blue
Potri.004G177000	Blue
Potri.004G177700	Blue
Potri.004G179000	Blue
Potri.004G182900	Blue
Potri.004G184900	Blue
Potri.004G188900	Blue
Potri.004G189700	Blue
Potri.004G190400	Blue
Potri.004G193500	Blue
Potri.004G196400	Blue
Potri.004G198200	Blue
Potri.004G199200	Blue
Potri.004G201800	Blue
Potri.004G201900	Blue
Potri.004G203200	Blue
Potri.004G204600	Blue
Potri.004G205100	Blue
Potri.004G206200	Blue
Potri.004G209000	Blue
Potri.004G210200	Blue
Potri.004G210400	Blue
Potri.004G211200	Blue
Potri.004G211300	Blue
Potri.004G212700	Blue
Potri.004G214000	Blue
Potri.004G217600	Blue
Potri.004G218700	Blue
Potri.004G222300	Blue
Potri.004G225800	Blue
Potri.004G227200	Blue
Potri.004G228600	Blue
Potri.004G229200	Blue
Potri.004G229400	Blue
Potri.004G229500	Blue
Potri.004G229700	Blue
Potri.004G232400	Blue
Potri.004G234100	Blue
Potri.004G235200	Blue
Potri.004G236000	Blue
Potri.004G236900	Blue
Potri.005G000300	Blue
Potri.005G001800	Blue
Potri.005G002700	Blue
Potri.005G002800	Blue
Potri.005G003800	Blue
Potri.005G005300	Blue
Potri.005G005900	Blue
Potri.005G010200	Blue
Potri.005G020600	Blue
Potri.005G021700	Blue
Potri.005G022600	Blue
Potri.005G024600	Blue
Potri.005G026800	Blue
Potri.005G027000	Blue
Potri.005G033700	Blue
Potri.005G037000	Blue
Potri.005G039100	Blue
Potri.005G040300	Blue
Potri.005G043200	Blue
Potri.005G044000	Blue
Potri.005G045200	Blue
Potri.005G045700	Blue
Potri.005G046500	Blue
Potri.005G046700	Blue
Potri.005G048900	Blue
Potri.005G049100	Blue
Potri.005G049800	Blue
Potri.005G053700	Blue
Potri.005G057300	Blue
Potri.005G058900	Blue
Potri.005G065100	Blue
Potri.005G068400	Blue
Potri.005G071500	Blue
Potri.005G073600	Blue
Potri.005G074200	Blue
Potri.005G076600	Blue
Potri.005G079900	Blue
Potri.005G080500	Blue
Potri.005G080800	Blue
Potri.005G083500	Blue
Potri.005G083800	Blue
Potri.005G086100	Blue
Potri.005G086500	Blue
Potri.005G092700	Blue
Potri.005G094600	Blue
Potri.005G095200	Blue
Potri.005G097400	Blue
Potri.005G099800	Blue
Potri.005G105400	Blue
Potri.005G107400	Blue
Potri.005G107600	Blue
Potri.005G109700	Blue
Potri.005G110500	Blue
Potri.005G110600	Blue
Potri.005G114300	Blue
Potri.005G116500	Blue
Potri.005G117300	Blue
Potri.005G117900	Blue
Potri.005G118300	Blue
Potri.005G118800	Blue
Potri.005G120600	Blue
Potri.005G123500	Blue
Potri.005G123700	Blue
Potri.005G123800	Blue
Potri.005G123900	Blue
Potri.005G124300	Blue
Potri.005G125500	Blue
Potri.005G128900	Blue
Potri.005G129800	Blue
Potri.005G130800	Blue
Potri.005G131200	Blue
Potri.005G131300	Blue
Potri.005G136600	Blue
Potri.005G137100	Blue
Potri.005G137700	Blue
Potri.005G138200	Blue
Potri.005G142700	Blue
Potri.005G144800	Blue
Potri.005G145000	Blue
Potri.005G146600	Blue
Potri.005G147400	Blue
Potri.005G147700	Blue
Potri.005G148900	Blue
Potri.005G150100	Blue
Potri.005G151500	Blue
Potri.005G153800	Blue
Potri.005G155600	Blue
Potri.005G156900	Blue
Potri.005G157400	Blue
Potri.005G158000	Blue
Potri.005G158100	Blue
Potri.005G159300	Blue
Potri.005G164100	Blue
Potri.005G168600	Blue
Potri.005G170100	Blue
Potri.005G171800	Blue
Potri.005G172100	Blue
Potri.005G173200	Blue
Potri.005G179500	Blue
Potri.005G180100	Blue
Potri.005G180800	Blue
Potri.005G182100	Blue
Potri.005G182900	Blue
Potri.005G183700	Blue
Potri.005G186900	Blue
Potri.005G188000	Blue
Potri.005G190000	Blue
Potri.005G191500	Blue
Potri.005G192000	Blue
Potri.005G197000	Blue
Potri.005G202000	Blue
Potri.005G203100	Blue
Potri.005G204400	Blue
Potri.005G206000	Blue
Potri.005G206500	Blue
Potri.005G207700	Blue
Potri.005G210200	Blue
Potri.005G210500	Blue
Potri.005G211400	Blue
Potri.005G213300	Blue
Potri.005G215200	Blue
Potri.005G217800	Blue
Potri.005G220400	Blue
Potri.005G221100	Blue
Potri.005G222500	Blue
Potri.005G222800	Blue
Potri.005G222900	Blue
Potri.005G227100	Blue
Potri.005G230500	Blue
Potri.005G233800	Blue
Potri.005G235000	Blue
Potri.005G236400	Blue
Potri.005G237500	Blue
Potri.005G241400	Blue
Potri.005G243000	Blue
Potri.005G243600	Blue
Potri.005G245100	Blue
Potri.005G247900	Blue
Potri.005G251000	Blue
Potri.005G253000	Blue
Potri.005G254000	Blue
Potri.005G256700	Blue
Potri.005G257400	Blue
Potri.005G259700	Blue
Potri.005G260400	Blue
Potri.006G004700	Blue
Potri.006G010100	Blue
Potri.006G011700	Blue
Potri.006G014400	Blue
Potri.006G017300	Blue
Potri.006G020700	Blue
Potri.006G020800	Blue
Potri.006G021200	Blue
Potri.006G021300	Blue
Potri.006G021900	Blue
Potri.006G031900	Blue
Potri.006G034900	Blue
Potri.006G036500	Blue
Potri.006G037500	Blue
Potri.006G038500	Blue
Potri.006G043800	Blue
Potri.006G045400	Blue
Potri.006G045500	Blue
Potri.006G047100	Blue
Potri.006G047700	Blue
Potri.006G049300	Blue
Potri.006G053800	Blue
Potri.006G054100	Blue
Potri.006G054600	Blue
Potri.006G055000	Blue
Potri.006G055300	Blue
Potri.006G059700	Blue
Potri.006G061500	Blue
Potri.006G062800	Blue
Potri.006G063200	Blue
Potri.006G063500	Blue
Potri.006G064300	Blue
Potri.006G065000	Blue
Potri.006G065600	Blue
Potri.006G066200	Blue
Potri.006G073600	Blue
Potri.006G074400	Blue
Potri.006G075200	Blue
Potri.006G076000	Blue
Potri.006G077800	Blue
Potri.006G078700	Blue
Potri.006G079900	Blue
Potri.006G081700	Blue
Potri.006G083600	Blue
Potri.006G085700	Blue
Potri.006G086200	Blue
Potri.006G092900	Blue
Potri.006G093000	Blue
Potri.006G096000	Blue
Potri.006G097600	Blue
Potri.006G100800	Blue
Potri.006G105800	Blue
Potri.006G106000	Blue
Potri.006G106600	Blue
Potri.006G108800	Blue
Potri.006G113000	Blue
Potri.006G113900	Blue
Potri.006G117800	Blue
Potri.006G118700	Blue
Potri.006G119700	Blue
Potri.006G120200	Blue
Potri.006G120800	Blue
Potri.006G125200	Blue
Potri.006G127100	Blue
Potri.006G127500	Blue
Potri.006G129000	Blue
Potri.006G129100	Blue
Potri.006G131800	Blue
Potri.006G132000	Blue
Potri.006G132100	Blue
Potri.006G132300	Blue
Potri.006G133900	Blue
Potri.006G134000	Blue
Potri.006G135500	Blue
Potri.006G136900	Blue
Potri.006G138500	Blue
Potri.006G143300	Blue
Potri.006G145500	Blue
Potri.006G146600	Blue
Potri.006G150100	Blue
Potri.006G151100	Blue
Potri.006G151800	Blue
Potri.006G152100	Blue
Potri.006G153100	Blue
Potri.006G153600	Blue
Potri.006G162900	Blue
Potri.006G165100	Blue
Potri.006G166200	Blue
Potri.006G166300	Blue
Potri.006G167800	Blue
Potri.006G175200	Blue
Potri.006G175300	Blue
Potri.006G176600	Blue
Potri.006G182000	Blue
Potri.006G182600	Blue
Potri.006G185200	Blue
Potri.006G186700	Blue
Potri.006G188000	Blue
Potri.006G191400	Blue
Potri.006G191800	Blue
Potri.006G193600	Blue
Potri.006G194200	Blue
Potri.006G196000	Blue
Potri.006G199600	Blue
Potri.006G201100	Blue
Potri.006G203000	Blue
Potri.006G205100	Blue
Potri.006G208300	Blue
Potri.006G208900	Blue
Potri.006G211700	Blue
Potri.006G213400	Blue
Potri.006G218800	Blue
Potri.006G218900	Blue
Potri.006G220000	Blue
Potri.006G220900	Blue
Potri.006G221700	Blue
Potri.006G224600	Blue
Potri.006G225100	Blue
Potri.006G226300	Blue
Potri.006G227200	Blue
Potri.006G229400	Blue
Potri.006G231000	Blue
Potri.006G231800	Blue
Potri.006G233000	Blue
Potri.006G233100	Blue
Potri.006G233800	Blue
Potri.006G234500	Blue
Potri.006G235400	Blue
Potri.006G236600	Blue
Potri.006G239900	Blue
Potri.006G240300	Blue
Potri.006G244900	Blue
Potri.006G245800	Blue
Potri.006G246800	Blue
Potri.006G247400	Blue
Potri.006G248100	Blue
Potri.006G249700	Blue
Potri.006G250800	Blue
Potri.006G250900	Blue
Potri.006G251900	Blue
Potri.006G255700	Blue
Potri.006G256000	Blue
Potri.006G256400	Blue
Potri.006G262100	Blue
Potri.006G262200	Blue
Potri.006G262700	Blue
Potri.006G263300	Blue
Potri.006G265700	Blue
Potri.006G265900	Blue
Potri.006G266100	Blue
Potri.006G270600	Blue
Potri.006G273700	Blue
Potri.006G275200	Blue
Potri.006G275600	Blue
Potri.006G280200	Blue
Potri.007G000700	Blue
Potri.007G002700	Blue
Potri.007G003400	Blue
Potri.007G004600	Blue
Potri.007G004900	Blue
Potri.007G007700	Blue
Potri.007G009800	Blue
Potri.007G010000	Blue
Potri.007G010600	Blue
Potri.007G011100	Blue
Potri.007G011900	Blue
Potri.007G014100	Blue
Potri.007G015900	Blue
Potri.007G016000	Blue
Potri.007G018500	Blue
Potri.007G019400	Blue
Potri.007G019500	Blue
Potri.007G024100	Blue
Potri.007G026300	Blue
Potri.007G026900	Blue
Potri.007G028500	Blue
Potri.007G028600	Blue
Potri.007G028800	Blue
Potri.007G029700	Blue
Potri.007G034900	Blue
Potri.007G041300	Blue
Potri.007G043300	Blue
Potri.007G044100	Blue
Potri.007G044400	Blue
Potri.007G049000	Blue
Potri.007G052700	Blue
Potri.007G056400	Blue
Potri.007G059000	Blue
Potri.007G059100	Blue
Potri.007G061100	Blue
Potri.007G063200	Blue
Potri.007G063600	Blue
Potri.007G067700	Blue
Potri.007G070100	Blue
Potri.007G070400	Blue
Potri.007G070700	Blue
Potri.007G078100	Blue
Potri.007G078700	Blue
Potri.007G086700	Blue
Potri.007G086900	Blue
Potri.007G092200	Blue
Potri.007G093400	Blue
Potri.007G094900	Blue
Potri.007G098400	Blue
Potri.007G102000	Blue
Potri.007G102100	Blue
Potri.007G102400	Blue
Potri.007G106000	Blue
Potri.007G107400	Blue
Potri.007G107800	Blue
Potri.007G113300	Blue
Potri.007G115400	Blue
Potri.007G116300	Blue
Potri.007G118300	Blue
Potri.007G119300	Blue
Potri.007G121800	Blue
Potri.007G127800	Blue
Potri.007G127900	Blue
Potri.007G129800	Blue
Potri.007G130800	Blue
Potri.007G132700	Blue
Potri.007G135500	Blue
Potri.007G144800	Blue
Potri.007G145800	Blue
Potri.007G146500	Blue
Potri.007G147200	Blue
Potri.008G004300	Blue
Potri.008G008100	Blue
Potri.008G009400	Blue
Potri.008G012600	Blue
Potri.008G014100	Blue
Potri.008G014800	Blue
Potri.008G015700	Blue
Potri.008G020600	Blue
Potri.008G024300	Blue
Potri.008G025000	Blue
Potri.008G025900	Blue
Potri.008G026900	Blue
Potri.008G029200	Blue
Potri.008G029400	Blue
Potri.008G030100	Blue
Potri.008G031800	Blue
Potri.008G032800	Blue
Potri.008G033800	Blue
Potri.008G035100	Blue
Potri.008G035300	Blue
Potri.008G035700	Blue
Potri.008G038400	Blue
Potri.008G039000	Blue
Potri.008G039800	Blue
Potri.008G041900	Blue
Potri.008G042300	Blue
Potri.008G043600	Blue
Potri.008G044600	Blue
Potri.008G045400	Blue
Potri.008G045800	Blue
Potri.008G046700	Blue
Potri.008G047600	Blue
Potri.008G047700	Blue
Potri.008G048000	Blue
Potri.008G048900	Blue
Potri.008G050400	Blue
Potri.008G051600	Blue
Potri.008G052700	Blue
Potri.008G060900	Blue
Potri.008G064400	Blue
Potri.008G070300	Blue
Potri.008G070600	Blue
Potri.008G071400	Blue
Potri.008G072700	Blue
Potri.008G075900	Blue
Potri.008G078600	Blue
Potri.008G079300	Blue
Potri.008G080900	Blue
Potri.008G083100	Blue
Potri.008G083300	Blue
Potri.008G085300	Blue
Potri.008G085400	Blue
Potri.008G085700	Blue
Potri.008G085800	Blue
Potri.008G086900	Blue
Potri.008G088600	Blue
Potri.008G092800	Blue
Potri.008G094400	Blue
Potri.008G096400	Blue
Potri.008G096800	Blue
Potri.008G098600	Blue
Potri.008G100600	Blue
Potri.008G105200	Blue
Potri.008G107300	Blue
Potri.008G108800	Blue
Potri.008G111100	Blue
Potri.008G113700	Blue
Potri.008G114800	Blue
Potri.008G114900	Blue
Potri.008G117700	Blue
Potri.008G118500	Blue
Potri.008G123300	Blue
Potri.008G124400	Blue
Potri.008G125500	Blue
Potri.008G126900	Blue
Potri.008G129600	Blue
Potri.008G129700	Blue
Potri.008G130200	Blue
Potri.008G130300	Blue
Potri.008G134800	Blue
Potri.008G135500	Blue
Potri.008G140600	Blue
Potri.008G142700	Blue
Potri.008G144200	Blue
Potri.008G145100	Blue
Potri.008G146600	Blue
Potri.008G147100	Blue
Potri.008G148400	Blue
Potri.008G149700	Blue
Potri.008G149900	Blue
Potri.008G150100	Blue
Potri.008G151200	Blue
Potri.008G152600	Blue
Potri.008G158800	Blue
Potri.008G161300	Blue
Potri.008G163300	Blue
Potri.008G165000	Blue
Potri.008G168300	Blue
Potri.008G169300	Blue
Potri.008G172800	Blue
Potri.008G178000	Blue
Potri.008G178200	Blue
Potri.008G179100	Blue
Potri.008G179800	Blue
Potri.008G181200	Blue
Potri.008G182000	Blue
Potri.008G182500	Blue
Potri.008G183400	Blue
Potri.008G183500	Blue
Potri.008G186100	Blue
Potri.008G186900	Blue
Potri.008G192200	Blue
Potri.008G193300	Blue
Potri.008G193500	Blue
Potri.008G193700	Blue
Potri.008G194700	Blue
Potri.008G195500	Blue
Potri.008G195900	Blue
Potri.008G196400	Blue
Potri.008G200200	Blue
Potri.008G201500	Blue
Potri.008G202100	Blue
Potri.008G205600	Blue
Potri.008G205900	Blue
Potri.008G206300	Blue
Potri.008G211200	Blue
Potri.008G215100	Blue
Potri.008G215700	Blue
Potri.008G216800	Blue
Potri.008G219000	Blue
Potri.008G221500	Blue
Potri.008G225600	Blue
Potri.009G001700	Blue
Potri.009G002100	Blue
Potri.009G003500	Blue
Potri.009G003900	Blue
Potri.009G004100	Blue
Potri.009G007900	Blue
Potri.009G011400	Blue
Potri.009G011800	Blue
Potri.009G012900	Blue
Potri.009G014400	Blue
Potri.009G014500	Blue
Potri.009G014700	Blue
Potri.009G014800	Blue
Potri.009G015000	Blue
Potri.009G016900	Blue
Potri.009G017700	Blue
Potri.009G019200	Blue
Potri.009G022200	Blue
Potri.009G022900	Blue
Potri.009G025700	Blue
Potri.009G026100	Blue
Potri.009G031300	Blue
Potri.009G032300	Blue
Potri.009G034900	Blue
Potri.009G036900	Blue
Potri.009G039300	Blue
Potri.009G040500	Blue
Potri.009G041200	Blue
Potri.009G043100	Blue
Potri.009G046300	Blue
Potri.009G046700	Blue
Potri.009G046800	Blue
Potri.009G047800	Blue
Potri.009G049100	Blue
Potri.009G049200	Blue
Potri.009G051900	Blue
Potri.009G053400	Blue
Potri.009G053500	Blue
Potri.009G054600	Blue
Potri.009G054800	Blue
Potri.009G059000	Blue
Potri.009G059500	Blue
Potri.009G059700	Blue
Potri.009G063800	Blue
Potri.009G064600	Blue
Potri.009G065500	Blue
Potri.009G075800	Blue
Potri.009G076000	Blue
Potri.009G076600	Blue
Potri.009G077600	Blue
Potri.009G079900	Blue
Potri.009G080000	Blue
Potri.009G080800	Blue
Potri.009G082000	Blue
Potri.009G084500	Blue
Potri.009G088400	Blue
Potri.009G090400	Blue
Potri.009G093300	Blue
Potri.009G095700	Blue
Potri.009G098000	Blue
Potri.009G101200	Blue
Potri.009G102900	Blue
Potri.009G103000	Blue
Potri.009G103400	Blue
Potri.009G103500	Blue
Potri.009G103700	Blue
Potri.009G108300	Blue
Potri.009G111200	Blue
Potri.009G112100	Blue
Potri.009G116200	Blue
Potri.009G119200	Blue
Potri.009G120900	Blue
Potri.009G122900	Blue
Potri.009G123800	Blue
Potri.009G124200	Blue
Potri.009G129700	Blue
Potri.009G130000	Blue
Potri.009G131200	Blue
Potri.009G132900	Blue
Potri.009G134300	Blue
Potri.009G136000	Blue
Potri.009G137200	Blue
Potri.009G139500	Blue
Potri.009G144800	Blue
Potri.009G145900	Blue
Potri.009G149100	Blue
Potri.009G152500	Blue
Potri.009G155200	Blue
Potri.009G155500	Blue
Potri.009G156200	Blue
Potri.009G159000	Blue
Potri.009G160900	Blue
Potri.009G165600	Blue
Potri.009G166900	Blue
Potri.009G167500	Blue
Potri.009G168300	Blue
Potri.010G001400	Blue
Potri.010G002900	Blue
Potri.010G006000	Blue
Potri.010G006300	Blue
Potri.010G014500	Blue
Potri.010G016800	Blue
Potri.010G021400	Blue
Potri.010G022400	Blue
Potri.010G023200	Blue
Potri.010G025700	Blue
Potri.010G026200	Blue
Potri.010G027800	Blue
Potri.010G027900	Blue
Potri.010G028200	Blue
Potri.010G028300	Blue
Potri.010G028600	Blue
Potri.010G029400	Blue
Potri.010G029700	Blue
Potri.010G030200	Blue
Potri.010G030900	Blue
Potri.010G031300	Blue
Potri.010G031900	Blue
Potri.010G034800	Blue
Potri.010G035400	Blue
Potri.010G037600	Blue
Potri.010G038500	Blue
Potri.010G038700	Blue
Potri.010G039900	Blue
Potri.010G040100	Blue
Potri.010G041200	Blue
Potri.010G046000	Blue
Potri.010G047500	Blue
Potri.010G048700	Blue
Potri.010G049100	Blue
Potri.010G051600	Blue
Potri.010G051700	Blue
Potri.010G054600	Blue
Potri.010G055600	Blue
Potri.010G056900	Blue
Potri.010G057200	Blue
Potri.010G059000	Blue
Potri.010G062300	Blue
Potri.010G067500	Blue
Potri.010G067900	Blue
Potri.010G068400	Blue
Potri.010G069000	Blue
Potri.010G073600	Blue
Potri.010G075000	Blue
Potri.010G078200	Blue
Potri.010G081400	Blue
Potri.010G084100	Blue
Potri.010G086700	Blue
Potri.010G087400	Blue
Potri.010G087700	Blue
Potri.010G089700	Blue
Potri.010G090100	Blue
Potri.010G090400	Blue
Potri.010G090900	Blue
Potri.010G091500	Blue
Potri.010G094700	Blue
Potri.010G095800	Blue
Potri.010G096500	Blue
Potri.010G098200	Blue
Potri.010G098700	Blue
Potri.010G099000	Blue
Potri.010G099300	Blue
Potri.010G100900	Blue
Potri.010G102000	Blue
Potri.010G102600	Blue
Potri.010G102900	Blue
Potri.010G103400	Blue
Potri.010G105600	Blue
Potri.010G110700	Blue
Potri.010G111900	Blue
Potri.010G116400	Blue
Potri.010G117800	Blue
Potri.010G118300	Blue
Potri.010G119500	Blue
Potri.010G122200	Blue
Potri.010G124000	Blue
Potri.010G126900	Blue
Potri.010G129300	Blue
[truncated: 11,994 more rows]

## Sheet: Table S4
Xylem systems genetics analysis reveals a key regulator of lignin biosynthesis in Populus deltoides
Table S4 - Genes present in the modules identified in the WGCNA analysis using only the genes present in the modules black and red (1st analysis)
Gene	Module	Lignin pathway
Potri.001G036400	Blue
Potri.001G055100	Blue
Potri.001G056800	Blue
Potri.001G099800	Blue
Potri.001G115600	Blue
Potri.001G168600	Blue
Potri.001G228100	Blue
Potri.001G233700	Blue
Potri.001G259200	Blue
Potri.001G275200	Blue
Potri.001G280200	Blue
Potri.001G324700	Blue
Potri.001G348400	Blue
Potri.001G354900	Blue
Potri.001G355600	Blue
Potri.001G362100	Blue
Potri.001G372000	Blue
Potri.001G381300	Blue
Potri.001G381900	Blue
Potri.001G409900	Blue
Potri.001G416300	Blue
Potri.001G455300	Blue
Potri.001G472800	Blue
Potri.002G007700	Blue
Potri.002G007800	Blue
Potri.002G025200	Blue
Potri.002G034600	Blue
Potri.002G036200	Blue
Potri.002G049400	Blue
Potri.002G059000	Blue
Potri.002G059900	Blue
Potri.002G070900	Blue
Potri.002G071800	Blue
Potri.002G079200	Blue
Potri.002G088000	Blue
Potri.002G123500	Blue
Potri.002G163200	Blue
Potri.002G178500	Blue
Potri.002G200200	Blue
Potri.002G206900	Blue
Potri.002G216600	Blue
Potri.003G056100	Blue
Potri.003G070200	Blue
Potri.003G070400	Blue
Potri.003G073700	Blue
Potri.003G111600	Blue
Potri.003G124600	Blue
Potri.003G129000	Blue
Potri.003G132000	Blue
Potri.003G143200	Blue
Potri.003G155800	Blue
Potri.003G159200	Blue
Potri.003G162700	Blue
Potri.003G164800	Blue
Potri.003G173300	Blue
Potri.003G178700	Blue
Potri.003G223800	Blue
Potri.004G050200	Blue
Potri.004G058100	Blue
Potri.004G059600	Blue
Potri.004G106400	Blue
Potri.004G152400	Blue
Potri.004G155100	Blue
Potri.004G157700	Blue
Potri.004G161100	Blue
Potri.004G197500	Blue
Potri.004G197700	Blue
Potri.004G217700	Blue
Potri.004G226900	Blue
Potri.005G001100	Blue
Potri.005G003300	Blue
Potri.005G021100	Blue
Potri.005G034100	Blue
Potri.005G044900	Blue
Potri.005G054700	Blue
Potri.005G080100	Blue
Potri.005G086200	Blue
Potri.005G089200	Blue
Potri.005G102200	Blue
Potri.005G105900	Blue
Potri.005G111100	Blue
Potri.005G111600	Blue
Potri.005G116800	Blue
Potri.005G172900	Blue
Potri.005G187400	Blue
Potri.005G192900	Blue
Potri.005G194200	Blue
Potri.005G216300	Blue
Potri.005G226700	Blue
Potri.005G253500	Blue
Potri.006G013200	Blue
Potri.006G015700	Blue
Potri.006G056300	Blue
Potri.006G058900	Blue
Potri.006G120400	Blue
Potri.006G144500	Blue
Potri.006G152700	Blue
Potri.006G166600	Blue
Potri.006G182100	Blue
Potri.006G185700	Blue
Potri.006G194900	Blue
Potri.006G200400	Blue
Potri.006G219500	Blue
Potri.006G224900	Blue
Potri.006G238200	Blue
Potri.006G281400	Blue
Potri.007G061500	Blue
Potri.007G063100	Blue
Potri.007G069500	Blue
Potri.007G087200	Blue
Potri.007G106100	Blue
Potri.007G131300	Blue
Potri.007G147100	Blue
Potri.008G031200	Blue
Potri.008G069000	Blue
Potri.008G077100	Blue
Potri.008G084100	Blue
Potri.008G094800	Blue
Potri.008G095500	Blue
Potri.008G135100	Blue
Potri.008G139700	Blue
Potri.008G156200	Blue
Potri.008G156600	Blue
Potri.008G162800	Blue
Potri.008G171400	Blue
Potri.008G177500	Blue
Potri.008G178100	Blue
Potri.008G179700	Blue
Potri.008G201600	Blue
Potri.008G223000	Blue
Potri.009G002900	Blue
Potri.009G011200	Blue
Potri.009G027500	Blue
Potri.009G061000	Blue
Potri.009G069700	Blue
Potri.009G073600	Blue
Potri.009G075200	Blue
Potri.009G075400	Blue
Potri.009G122100	Blue
Potri.009G138000	Blue
Potri.010G038900	Blue
Potri.010G045600	Blue
Potri.010G056200	Blue
Potri.010G066200	Blue
Potri.010G081800	Blue
Potri.010G083300	Blue
Potri.010G092300	Blue
Potri.010G109500	Blue
Potri.010G134200	Blue
Potri.010G137300	Blue
Potri.010G174200	Blue
Potri.010G180500	Blue
Potri.010G188400	Blue
Potri.010G202400	Blue
Potri.010G231100	Blue
Potri.010G233700	Blue
Potri.010G255400	Blue
Potri.011G009900	Blue
Potri.011G058400	Blue
Potri.011G068300	Blue
Potri.011G094800	Blue
Potri.011G122900	Blue
Potri.011G136700	Blue
Potri.011G146700	Blue
Potri.011G169300	Blue
Potri.012G018200	Blue
Potri.012G036500	Blue
Potri.012G088100	Blue
Potri.012G090800	Blue
Potri.012G107100	Blue
Potri.012G107900	Blue
Potri.012G130500	Blue
Potri.013G003700	Blue
Potri.013G011500	Blue
Potri.013G014700	Blue
Potri.013G023600	Blue
Potri.013G060500	Blue
Potri.013G064300	Blue
Potri.014G024700	Blue
Potri.014G031900	Blue
Potri.014G074700	Blue
Potri.014G087900	Blue
Potri.014G088800	Blue
Potri.014G119600	Blue
Potri.014G144800	Blue
Potri.014G175200	Blue
Potri.015G029000	Blue
Potri.015G033100	Blue
Potri.015G033400	Blue
Potri.015G039800	Blue
Potri.015G045600	Blue
Potri.015G045700	Blue
Potri.015G075300	Blue
Potri.015G076400	Blue
Potri.015G094800	Blue
Potri.015G106000	Blue
Potri.016G001000	Blue
Potri.016G004800	Blue
Potri.016G010200	Blue
Potri.016G010800	Blue
Potri.016G013300	Blue
Potri.016G020100	Blue
Potri.016G065200	Blue
Potri.016G116200	Blue
Potri.016G136500	Blue
Potri.016G141600	Blue
Potri.017G000500	Blue
Potri.017G026500	Blue
Potri.018G022700	Blue
Potri.018G026900	Blue
Potri.018G027100	Blue
Potri.018G068700	Blue
Potri.018G081000	Blue
Potri.018G103800	Blue
Potri.018G127300	Blue
Potri.018G142800	Blue
Potri.019G047600	Blue
Potri.019G056500	Blue
Potri.019G087000	Blue
XLOC_067966	Blue
Potri.001G010600	Brown
Potri.001G018200	Brown
Potri.001G230900	Brown
Potri.002G048600	Brown
Potri.002G148900	Brown
Potri.002G149000	Brown
Potri.004G049000	Brown
Potri.004G049300	Brown
Potri.004G202200	Brown
Potri.008G034800	Brown
Potri.008G200500	Brown
Potri.010G027600	Brown
Potri.010G029300	Brown
Potri.010G107900	Brown
Potri.011G123500	Brown
Potri.012G090900	Brown
Potri.012G135100	Brown
Potri.014G006800	Brown
Potri.014G182000	Brown
Potri.014G184100	Brown
Potri.015G087400	Brown
Potri.015G087500	Brown
Potri.016G025500	Brown
Potri.016G098100	Brown
Potri.016G112600	Brown
Potri.017G027700	Brown
Potri.017G038100	Brown
Potri.018G031900	Brown
Potri.001G036900	Turquoise	X
Potri.001G175000	Turquoise	X
Potri.001G304800	Turquoise	X
Potri.003G059200	Turquoise	X
Potri.003G181400	Turquoise	X
Potri.003G183900	Turquoise	X
Potri.003G188500	Turquoise	X
Potri.005G117500	Turquoise	X
Potri.006G033300	Turquoise	X
Potri.007G016400	Turquoise	X
Potri.008G038200	Turquoise	X
Potri.008G136600	Turquoise	X
Potri.009G095800	Turquoise	X
Potri.009G099800	Turquoise	X
Potri.010G224100	Turquoise	X
Potri.012G006400	Turquoise	X
Potri.013G157900	Turquoise	X
Potri.019G130700	Turquoise	X
Potri.001G000700	Turquoise
Potri.001G000900	Turquoise
Potri.001G005500	Turquoise
Potri.001G009100	Turquoise
Potri.001G018700	Turquoise
Potri.001G023800	Turquoise
Potri.001G026400	Turquoise
Potri.001G026600	Turquoise
Potri.001G030100	Turquoise
Potri.001G033600	Turquoise
Potri.001G037400	Turquoise
Potri.001G047100	Turquoise
Potri.001G052100	Turquoise
Potri.001G059400	Turquoise
Potri.001G059800	Turquoise
Potri.001G062700	Turquoise
Potri.001G068100	Turquoise
Potri.001G073900	Turquoise
Potri.001G075600	Turquoise
Potri.001G075700	Turquoise
Potri.001G087200	Turquoise
Potri.001G087800	Turquoise
Potri.001G090300	Turquoise
Potri.001G104600	Turquoise
Potri.001G107000	Turquoise
Potri.001G108700	Turquoise
Potri.001G112000	Turquoise
Potri.001G112200	Turquoise
Potri.001G114600	Turquoise
Potri.001G117900	Turquoise
Potri.001G118800	Turquoise
Potri.001G121400	Turquoise
Potri.001G127100	Turquoise
Potri.001G133200	Turquoise
Potri.001G135100	Turquoise
Potri.001G138000	Turquoise
Potri.001G138400	Turquoise
Potri.001G140900	Turquoise
Potri.001G142100	Turquoise
Potri.001G142600	Turquoise
Potri.001G143600	Turquoise
Potri.001G150600	Turquoise
Potri.001G157700	Turquoise
Potri.001G157800	Turquoise
Potri.001G158900	Turquoise
Potri.001G163100	Turquoise
Potri.001G165600	Turquoise
Potri.001G174900	Turquoise
Potri.001G177400	Turquoise
Potri.001G188800	Turquoise
Potri.001G190400	Turquoise
Potri.001G190800	Turquoise
Potri.001G206800	Turquoise
Potri.001G208800	Turquoise
Potri.001G209400	Turquoise
Potri.001G213600	Turquoise
Potri.001G215400	Turquoise
Potri.001G218100	Turquoise
Potri.001G225200	Turquoise
Potri.001G227000	Turquoise
Potri.001G231000	Turquoise
Potri.001G231600	Turquoise
Potri.001G232200	Turquoise
Potri.001G236100	Turquoise
Potri.001G237200	Turquoise
Potri.001G248800	Turquoise
Potri.001G256300	Turquoise
Potri.001G257100	Turquoise
Potri.001G267300	Turquoise
Potri.001G272700	Turquoise
Potri.001G272800	Turquoise
Potri.001G273000	Turquoise
Potri.001G275800	Turquoise
Potri.001G279500	Turquoise
Potri.001G280400	Turquoise
Potri.001G295800	Turquoise
Potri.001G300700	Turquoise
Potri.001G300900	Turquoise
Potri.001G302000	Turquoise
Potri.001G306200	Turquoise
Potri.001G309500	Turquoise
Potri.001G310100	Turquoise
Potri.001G320400	Turquoise
Potri.001G320500	Turquoise
Potri.001G320800	Turquoise
Potri.001G326600	Turquoise
Potri.001G327300	Turquoise
Potri.001G333200	Turquoise
Potri.001G333300	Turquoise
Potri.001G335100	Turquoise
Potri.001G343500	Turquoise
Potri.001G348500	Turquoise
Potri.001G352300	Turquoise
Potri.001G354700	Turquoise
Potri.001G356100	Turquoise
Potri.001G358200	Turquoise
Potri.001G370800	Turquoise
Potri.001G371200	Turquoise
Potri.001G373000	Turquoise
Potri.001G375700	Turquoise
Potri.001G378500	Turquoise
Potri.001G392200	Turquoise
Potri.001G399500	Turquoise
Potri.001G399700	Turquoise
Potri.001G399900	Turquoise
Potri.001G403600	Turquoise
Potri.001G403700	Turquoise
Potri.001G404500	Turquoise
Potri.001G410700	Turquoise
Potri.001G416600	Turquoise
Potri.001G416800	Turquoise
Potri.001G424500	Turquoise
Potri.001G435400	Turquoise
Potri.001G468700	Turquoise
Potri.001G472000	Turquoise
Potri.002G004600	Turquoise
Potri.002G005700	Turquoise
Potri.002G008600	Turquoise
Potri.002G011800	Turquoise
Potri.002G014500	Turquoise
Potri.002G016500	Turquoise
Potri.002G023000	Turquoise
Potri.002G023900	Turquoise
Potri.002G031000	Turquoise
Potri.002G031900	Turquoise
Potri.002G034400	Turquoise
Potri.002G036400	Turquoise
Potri.002G041700	Turquoise
Potri.002G045000	Turquoise
Potri.002G052800	Turquoise
Potri.002G055200	Turquoise
Potri.002G057700	Turquoise
Potri.002G061900	Turquoise
Potri.002G064800	Turquoise
Potri.002G064900	Turquoise
Potri.002G067800	Turquoise
Potri.002G071400	Turquoise
Potri.002G071900	Turquoise
Potri.002G074400	Turquoise
Potri.002G077900	Turquoise
Potri.002G079600	Turquoise
Potri.002G084900	Turquoise
Potri.002G085300	Turquoise
Potri.002G089300	Turquoise
Potri.002G090700	Turquoise
Potri.002G094700	Turquoise
Potri.002G099200	Turquoise
Potri.002G101200	Turquoise
Potri.002G101300	Turquoise
Potri.002G101800	Turquoise
Potri.002G102800	Turquoise
Potri.002G103800	Turquoise
Potri.002G104200	Turquoise
Potri.002G108000	Turquoise
Potri.002G109200	Turquoise
Potri.002G111800	Turquoise
Potri.002G111900	Turquoise
Potri.002G113100	Turquoise
Potri.002G113300	Turquoise
Potri.002G114700	Turquoise
Potri.002G118700	Turquoise
Potri.002G119800	Turquoise
Potri.002G122000	Turquoise
Potri.002G125800	Turquoise
Potri.002G127700	Turquoise
Potri.002G132900	Turquoise
Potri.002G133100	Turquoise
Potri.002G134200	Turquoise
Potri.002G145900	Turquoise
Potri.002G146400	Turquoise
Potri.002G153700	Turquoise
Potri.002G158500	Turquoise
Potri.002G160700	Turquoise
Potri.002G165400	Turquoise
Potri.002G165900	Turquoise
Potri.002G168300	Turquoise
Potri.002G168400	Turquoise
Potri.002G171500	Turquoise
Potri.002G173200	Turquoise
Potri.002G173400	Turquoise
Potri.002G176800	Turquoise
Potri.002G184900	Turquoise
Potri.002G187600	Turquoise
Potri.002G189000	Turquoise
Potri.002G191400	Turquoise
Potri.002G204000	Turquoise
Potri.002G213600	Turquoise
Potri.002G216000	Turquoise
Potri.002G217000	Turquoise
Potri.002G217200	Turquoise
Potri.002G223300	Turquoise
Potri.002G225800	Turquoise
Potri.002G228900	Turquoise
Potri.002G231100	Turquoise
Potri.002G231800	Turquoise
Potri.002G233400	Turquoise
Potri.002G238600	Turquoise
Potri.002G242500	Turquoise
Potri.002G242900	Turquoise
Potri.002G243000	Turquoise
Potri.002G249400	Turquoise
Potri.002G249600	Turquoise
Potri.002G251600	Turquoise
Potri.002G252600	Turquoise
Potri.002G253200	Turquoise
Potri.002G253500	Turquoise
Potri.002G254600	Turquoise
Potri.002G256600	Turquoise
Potri.002G257800	Turquoise
Potri.002G257900	Turquoise
Potri.002G261700	Turquoise
Potri.003G003700	Turquoise
Potri.003G018500	Turquoise
Potri.003G034900	Turquoise
Potri.003G047700	Turquoise
Potri.003G050100	Turquoise
Potri.003G053400	Turquoise
Potri.003G054800	Turquoise
Potri.003G064900	Turquoise
Potri.003G071500	Turquoise
Potri.003G073500	Turquoise
Potri.003G074700	Turquoise
Potri.003G080100	Turquoise
Potri.003G082500	Turquoise
Potri.003G084100	Turquoise
Potri.003G086700	Turquoise
Potri.003G090300	Turquoise
Potri.003G097300	Turquoise
Potri.003G097400	Turquoise
Potri.003G100200	Turquoise
Potri.003G106600	Turquoise
Potri.003G114100	Turquoise
Potri.003G115000	Turquoise
Potri.003G116500	Turquoise
Potri.003G117000	Turquoise
Potri.003G117100	Turquoise
Potri.003G118000	Turquoise
Potri.003G119400	Turquoise
Potri.003G120000	Turquoise
Potri.003G122900	Turquoise
Potri.003G124400	Turquoise
Potri.003G126800	Turquoise
Potri.003G127100	Turquoise
Potri.003G128600	Turquoise
Potri.003G130700	Turquoise
Potri.003G131600	Turquoise
Potri.003G132100	Turquoise
Potri.003G132400	Turquoise
Potri.003G133400	Turquoise
Potri.003G136000	Turquoise
Potri.003G138100	Turquoise
Potri.003G141100	Turquoise
Potri.003G142600	Turquoise
Potri.003G151700	Turquoise
Potri.003G155200	Turquoise
Potri.003G157100	Turquoise
Potri.003G161900	Turquoise
Potri.003G162800	Turquoise
Potri.003G163000	Turquoise
Potri.003G164200	Turquoise
Potri.003G177700	Turquoise
Potri.003G183200	Turquoise
Potri.003G183700	Turquoise
Potri.003G186400	Turquoise
Potri.003G187500	Turquoise
Potri.003G192900	Turquoise
Potri.003G198100	Turquoise
Potri.003G198200	Turquoise
Potri.003G205400	Turquoise
Potri.003G212400	Turquoise
Potri.003G220300	Turquoise
Potri.003G220900	Turquoise
Potri.003G221000	Turquoise
Potri.004G001800	Turquoise
Potri.004G007600	Turquoise
Potri.004G009600	Turquoise
Potri.004G013400	Turquoise
Potri.004G013800	Turquoise
Potri.004G015700	Turquoise
Potri.004G020700	Turquoise
Potri.004G028900	Turquoise
Potri.004G029600	Turquoise
Potri.004G036400	Turquoise
Potri.004G039100	Turquoise
Potri.004G040100	Turquoise
Potri.004G048200	Turquoise
Potri.004G053000	Turquoise
Potri.004G055000	Turquoise
Potri.004G062500	Turquoise
Potri.004G065900	Turquoise
Potri.004G067000	Turquoise
Potri.004G069600	Turquoise
Potri.004G070000	Turquoise
Potri.004G071000	Turquoise
Potri.004G075800	Turquoise
Potri.004G078800	Turquoise
Potri.004G081100	Turquoise
Potri.004G097500	Turquoise
Potri.004G099100	Turquoise
Potri.004G105500	Turquoise
Potri.004G118600	Turquoise
Potri.004G126500	Turquoise
Potri.004G126600	Turquoise
Potri.004G129900	Turquoise
Potri.004G135000	Turquoise
Potri.004G137200	Turquoise
Potri.004G138000	Turquoise
Potri.004G142800	Turquoise
Potri.004G143200	Turquoise
Potri.004G158400	Turquoise
Potri.004G159300	Turquoise
Potri.004G161300	Turquoise
Potri.004G161400	Turquoise
Potri.004G163400	Turquoise
Potri.004G168000	Turquoise
Potri.004G173800	Turquoise
Potri.004G174400	Turquoise
Potri.004G175400	Turquoise
Potri.004G184200	Turquoise
Potri.004G186900	Turquoise
Potri.004G188100	Turquoise
Potri.004G190800	Turquoise
Potri.004G200500	Turquoise
Potri.004G201600	Turquoise
Potri.004G203400	Turquoise
Potri.004G207500	Turquoise
Potri.004G211000	Turquoise
Potri.004G211400	Turquoise
Potri.004G211800	Turquoise
Potri.004G211900	Turquoise
Potri.004G212600	Turquoise
Potri.004G213300	Turquoise
Potri.004G218200	Turquoise
Potri.004G219100	Turquoise
Potri.004G223100	Turquoise
Potri.004G223300	Turquoise
Potri.004G226800	Turquoise
Potri.004G228400	Turquoise
Potri.005G012000	Turquoise
Potri.005G020400	Turquoise
Potri.005G021200	Turquoise
Potri.005G033500	Turquoise
Potri.005G033600	Turquoise
Potri.005G038800	Turquoise
Potri.005G045500	Turquoise
Potri.005G053500	Turquoise
Potri.005G061600	Turquoise
Potri.005G063200	Turquoise
Potri.005G065200	Turquoise
Potri.005G070400	Turquoise
Potri.005G071400	Turquoise
Potri.005G074100	Turquoise
Potri.005G074700	Turquoise
Potri.005G075900	Turquoise
Potri.005G079200	Turquoise
Potri.005G083000	Turquoise
Potri.005G099900	Turquoise
Potri.005G102000	Turquoise
Potri.005G102100	Turquoise
Potri.005G108000	Turquoise
Potri.005G108700	Turquoise
Potri.005G109400	Turquoise
Potri.005G109600	Turquoise
Potri.005G110900	Turquoise
Potri.005G114500	Turquoise
Potri.005G117200	Turquoise
Potri.005G126200	Turquoise
Potri.005G126500	Turquoise
Potri.005G137500	Turquoise
Potri.005G141300	Turquoise
Potri.005G141500	Turquoise
Potri.005G141600	Turquoise
Potri.005G144600	Turquoise
Potri.005G145300	Turquoise
Potri.005G148800	Turquoise
Potri.005G150000	Turquoise
Potri.005G157500	Turquoise
Potri.005G162800	Turquoise
Potri.005G165500	Turquoise
Potri.005G176500	Turquoise
Potri.005G178200	Turquoise
Potri.005G182800	Turquoise
Potri.005G184400	Turquoise
Potri.005G184700	Turquoise
Potri.005G186400	Turquoise
Potri.005G196500	Turquoise
Potri.005G199600	Turquoise
Potri.005G205300	Turquoise
Potri.005G205700	Turquoise
Potri.005G206600	Turquoise
Potri.005G206800	Turquoise
Potri.005G218900	Turquoise
Potri.005G226400	Turquoise
Potri.005G226600	Turquoise
Potri.005G230900	Turquoise
Potri.005G236200	Turquoise
Potri.005G237100	Turquoise
Potri.005G237700	Turquoise
Potri.005G241200	Turquoise
Potri.005G242700	Turquoise
Potri.005G244500	Turquoise
Potri.005G245600	Turquoise
Potri.005G249600	Turquoise
Potri.005G250800	Turquoise
Potri.005G253700	Turquoise
Potri.005G257800	Turquoise
Potri.005G260000	Turquoise
Potri.006G000300	Turquoise
Potri.006G001500	Turquoise
Potri.006G005600	Turquoise
Potri.006G011600	Turquoise
Potri.006G018000	Turquoise
Potri.006G025800	Turquoise
Potri.006G026500	Turquoise
Potri.006G036200	Turquoise
Potri.006G036300	Turquoise
Potri.006G049700	Turquoise
Potri.006G050200	Turquoise
Potri.006G051000	Turquoise
Potri.006G051500	Turquoise
Potri.006G051700	Turquoise
Potri.006G055400	Turquoise
Potri.006G056100	Turquoise
Potri.006G060700	Turquoise
Potri.006G061700	Turquoise
Potri.006G066600	Turquoise
Potri.006G069700	Turquoise
Potri.006G072300	Turquoise
Potri.006G077900	Turquoise
Potri.006G087100	Turquoise
Potri.006G090100	Turquoise
Potri.006G090300	Turquoise
Potri.006G092600	Turquoise
Potri.006G096800	Turquoise
Potri.006G096900	Turquoise
Potri.006G099600	Turquoise
Potri.006G104400	Turquoise
Potri.006G107300	Turquoise
Potri.006G108200	Turquoise
Potri.006G108300	Turquoise
Potri.006G119400	Turquoise
Potri.006G121200	Turquoise
Potri.006G122300	Turquoise
Potri.006G123200	Turquoise
Potri.006G126800	Turquoise
Potri.006G128000	Turquoise
Potri.006G129200	Turquoise
Potri.006G131000	Turquoise
Potri.006G131300	Turquoise
Potri.006G131400	Turquoise
Potri.006G135800	Turquoise
Potri.006G136700	Turquoise
Potri.006G137700	Turquoise
Potri.006G139500	Turquoise
Potri.006G140700	Turquoise
Potri.006G150900	Turquoise
Potri.006G167200	Turquoise
Potri.006G169600	Turquoise
Potri.006G181900	Turquoise
Potri.006G185600	Turquoise
Potri.006G187400	Turquoise
Potri.006G188100	Turquoise
Potri.006G193500	Turquoise
Potri.006G199000	Turquoise
Potri.006G200300	Turquoise
Potri.006G201600	Turquoise
Potri.006G204400	Turquoise
Potri.006G211200	Turquoise
Potri.006G217000	Turquoise
Potri.006G218400	Turquoise
Potri.006G220700	Turquoise
Potri.006G224800	Turquoise
Potri.006G225500	Turquoise
Potri.006G226900	Turquoise
Potri.006G227100	Turquoise
Potri.006G228600	Turquoise
Potri.006G229300	Turquoise
Potri.006G230800	Turquoise
Potri.006G232700	Turquoise
Potri.006G232900	Turquoise
Potri.006G233300	Turquoise
Potri.006G234100	Turquoise
Potri.006G237100	Turquoise
Potri.006G237700	Turquoise
Potri.006G240200	Turquoise
Potri.006G246600	Turquoise
Potri.006G248700	Turquoise
Potri.006G252100	Turquoise
Potri.006G254400	Turquoise
Potri.006G255200	Turquoise
Potri.006G261700	Turquoise
Potri.006G263000	Turquoise
Potri.006G263500	Turquoise
Potri.006G265800	Turquoise
Potri.006G278100	Turquoise
Potri.006G278700	Turquoise
Potri.006G279600	Turquoise
Potri.007G003200	Turquoise
Potri.007G006400	Turquoise
Potri.007G006900	Turquoise
Potri.007G008600	Turquoise
Potri.007G011000	Turquoise
Potri.007G011700	Turquoise
Potri.007G013900	Turquoise
Potri.007G014400	Turquoise
Potri.007G014800	Turquoise
Potri.007G017900	Turquoise
Potri.007G021000	Turquoise
Potri.007G024300	Turquoise
Potri.007G028900	Turquoise
Potri.007G032700	Turquoise
Potri.007G033600	Turquoise
Potri.007G039500	Turquoise
Potri.007G046100	Turquoise
Potri.007G047000	Turquoise
Potri.007G047500	Turquoise
Potri.007G047700	Turquoise
Potri.007G051000	Turquoise
Potri.007G051100	Turquoise
Potri.007G058400	Turquoise
Potri.007G063000	Turquoise
Potri.007G065800	Turquoise
Potri.007G070900	Turquoise
Potri.007G078500	Turquoise
Potri.007G081000	Turquoise
Potri.007G085900	Turquoise
Potri.007G097600	Turquoise
Potri.007G098500	Turquoise
Potri.007G099800	Turquoise
Potri.007G105600	Turquoise
Potri.007G107200	Turquoise
Potri.007G116400	Turquoise
Potri.007G121500	Turquoise
Potri.007G122600	Turquoise
Potri.007G124000	Turquoise
Potri.007G128600	Turquoise
Potri.007G128800	Turquoise
Potri.007G129700	Turquoise
Potri.007G129900	Turquoise
Potri.007G130300	Turquoise
Potri.007G131600	Turquoise
Potri.007G134500	Turquoise
Potri.007G135300	Turquoise
Potri.007G139200	Turquoise
Potri.007G139800	Turquoise
Potri.008G002300	Turquoise
Potri.008G006500	Turquoise
Potri.008G007000	Turquoise
Potri.008G008300	Turquoise
Potri.008G009500	Turquoise
Potri.008G012000	Turquoise
Potri.008G012400	Turquoise
Potri.008G018400	Turquoise
Potri.008G018600	Turquoise
Potri.008G020100	Turquoise
Potri.008G025300	Turquoise
Potri.008G026400	Turquoise
Potri.008G028800	Turquoise
Potri.008G029600	Turquoise
Potri.008G029800	Turquoise
Potri.008G030200	Turquoise
Potri.008G034500	Turquoise
Potri.008G034600	Turquoise
Potri.008G038100	Turquoise
Potri.008G038800	Turquoise
Potri.008G038900	Turquoise
Potri.008G039700	Turquoise
Potri.008G041300	Turquoise
Potri.008G041800	Turquoise
Potri.008G054400	Turquoise
Potri.008G056100	Turquoise
Potri.008G057300	Turquoise
Potri.008G060100	Turquoise
Potri.008G064000	Turquoise
Potri.008G064200	Turquoise
Potri.008G065200	Turquoise
Potri.008G068400	Turquoise
Potri.008G069100	Turquoise
Potri.008G069900	Turquoise
Potri.008G073200	Turquoise
Potri.008G073300	Turquoise
Potri.008G074800	Turquoise
Potri.008G083900	Turquoise
Potri.008G087600	Turquoise
Potri.008G092500	Turquoise
Potri.008G092700	Turquoise
Potri.008G093100	Turquoise
Potri.008G094700	Turquoise
Potri.008G095000	Turquoise
Potri.008G099300	Turquoise
Potri.008G103500	Turquoise
Potri.008G111900	Turquoise
Potri.008G112300	Turquoise
Potri.008G115700	Turquoise
Potri.008G116400	Turquoise
Potri.008G128000	Turquoise
Potri.008G134900	Turquoise
Potri.008G142800	Turquoise
Potri.008G144600	Turquoise
Potri.008G145900	Turquoise
Potri.008G148300	Turquoise
Potri.008G149300	Turquoise
Potri.008G161200	Turquoise
Potri.008G167800	Turquoise
Potri.008G170800	Turquoise
Potri.008G172400	Turquoise
Potri.008G176900	Turquoise
Potri.008G178600	Turquoise
Potri.008G182700	Turquoise
Potri.008G192100	Turquoise
Potri.008G198100	Turquoise
Potri.008G199100	Turquoise
Potri.008G202300	Turquoise
Potri.008G202600	Turquoise
Potri.008G204800	Turquoise
Potri.008G208200	Turquoise
Potri.008G221400	Turquoise
Potri.008G226200	Turquoise
Potri.009G006500	Turquoise
Potri.009G006900	Turquoise
Potri.009G009500	Turquoise
Potri.009G011000	Turquoise
Potri.009G011100	Turquoise
Potri.009G013500	Turquoise
Potri.009G017300	Turquoise
Potri.009G018900	Turquoise
Potri.009G021800	Turquoise
Potri.009G024000	Turquoise
Potri.009G024700	Turquoise
Potri.009G026000	Turquoise
Potri.009G027900	Turquoise
Potri.009G028000	Turquoise
Potri.009G030100	Turquoise
Potri.009G034700	Turquoise
Potri.009G042600	Turquoise
Potri.009G047300	Turquoise
Potri.009G051800	Turquoise
Potri.009G067200	Turquoise
Potri.009G069500	Turquoise
Potri.009G070400	Turquoise
Potri.009G074300	Turquoise
Potri.009G075300	Turquoise
Potri.009G075600	Turquoise
Potri.009G085100	Turquoise
Potri.009G115600	Turquoise
Potri.009G119500	Turquoise
Potri.009G119700	Turquoise
Potri.009G120000	Turquoise
Potri.009G129500	Turquoise
Potri.009G134000	Turquoise
Potri.009G134600	Turquoise
Potri.009G135300	Turquoise
Potri.009G146700	Turquoise
Potri.009G147500	Turquoise
Potri.009G148800	Turquoise
Potri.009G152800	Turquoise
Potri.009G160200	Turquoise
Potri.009G161400	Turquoise
Potri.009G164300	Turquoise
Potri.009G168800	Turquoise
Potri.009G169800	Turquoise
Potri.010G003100	Turquoise
Potri.010G003600	Turquoise
Potri.010G013500	Turquoise
Potri.010G022300	Turquoise
Potri.010G028700	Turquoise
Potri.010G028800	Turquoise
Potri.010G028900	Turquoise
Potri.010G029200	Turquoise
Potri.010G031600	Turquoise
Potri.010G033400	Turquoise
Potri.010G036200	Turquoise
Potri.010G038300	Turquoise
Potri.010G038400	Turquoise
Potri.010G042200	Turquoise
Potri.010G056600	Turquoise
Potri.010G058700	Turquoise
Potri.010G065200	Turquoise
Potri.010G065900	Turquoise
Potri.010G067100	Turquoise
Potri.010G076200	Turquoise
Potri.010G076500	Turquoise
Potri.010G079000	Turquoise
Potri.010G095900	Turquoise
Potri.010G097900	Turquoise
Potri.010G098300	Turquoise
Potri.010G100200	Turquoise
Potri.010G101400	Turquoise
Potri.010G105900	Turquoise
Potri.010G108100	Turquoise
Potri.010G122800	Turquoise
Potri.010G125200	Turquoise
Potri.010G127500	Turquoise
Potri.010G132500	Turquoise
Potri.010G133900	Turquoise
Potri.010G141600	Turquoise
Potri.010G146900	Turquoise
Potri.010G148500	Turquoise
Potri.010G153400	Turquoise
Potri.010G156600	Turquoise
Potri.010G157600	Turquoise
Potri.010G159300	Turquoise
Potri.010G160500	Turquoise
Potri.010G162400	Turquoise
Potri.010G169200	Turquoise
Potri.010G172400	Turquoise
Potri.010G175000	Turquoise
Potri.010G184000	Turquoise
Potri.010G184100	Turquoise
Potri.010G185100	Turquoise
Potri.010G187500	Turquoise
Potri.010G187600	Turquoise
Potri.010G191100	Turquoise
Potri.010G193100	Turquoise
Potri.010G198800	Turquoise
Potri.010G205000	Turquoise
Potri.010G205100	Turquoise
Potri.010G212900	Turquoise
Potri.010G216200	Turquoise
Potri.010G216600	Turquoise
Potri.010G221600	Turquoise
Potri.010G221700	Turquoise
Potri.010G223300	Turquoise
Potri.010G224300	Turquoise
Potri.010G225300	Turquoise
Potri.010G229600	Turquoise
Potri.010G231000	Turquoise
Potri.010G234100	Turquoise
Potri.010G236100	Turquoise
Potri.010G236700	Turquoise
Potri.010G241800	Turquoise
Potri.010G242700	Turquoise
Potri.010G244900	Turquoise
Potri.010G249600	Turquoise
Potri.010G249900	Turquoise
Potri.010G250600	Turquoise
Potri.010G252400	Turquoise
Potri.010G252500	Turquoise
Potri.011G001600	Turquoise
Potri.011G004700	Turquoise
Potri.011G007200	Turquoise
Potri.011G011100	Turquoise
Potri.011G015600	Turquoise
Potri.011G023200	Turquoise
Potri.011G041100	Turquoise
Potri.011G043800	Turquoise
Potri.011G045300	Turquoise
Potri.011G057200	Turquoise
Potri.011G057400	Turquoise
Potri.011G058100	Turquoise
Potri.011G061500	Turquoise
Potri.011G066100	Turquoise
Potri.011G069600	Turquoise
Potri.011G071900	Turquoise
Potri.011G079400	Turquoise
Potri.011G094900	Turquoise
Potri.011G096500	Turquoise
Potri.011G097100	Turquoise
Potri.011G111700	Turquoise
Potri.011G122700	Turquoise
Potri.011G126300	Turquoise
Potri.011G129900	Turquoise
Potri.011G131900	Turquoise
Potri.011G132500	Turquoise
Potri.011G132600	Turquoise
Potri.011G135300	Turquoise
Potri.011G143400	Turquoise
Potri.011G149200	Turquoise
Potri.011G153700	Turquoise
Potri.011G156100	Turquoise
Potri.011G167000	Turquoise
Potri.012G006500	Turquoise
Potri.012G015500	Turquoise
Potri.012G016000	Turquoise
Potri.012G016200	Turquoise
Potri.012G023400	Turquoise
Potri.012G032000	Turquoise
Potri.012G032200	Turquoise
Potri.012G034400	Turquoise
Potri.012G036600	Turquoise
Potri.012G039400	Turquoise
Potri.012G058900	Turquoise
Potri.012G061000	Turquoise
Potri.012G066200	Turquoise
Potri.012G069900	Turquoise
Potri.012G071700	Turquoise
Potri.012G080000	Turquoise
Potri.012G080100	Turquoise
Potri.012G080700	Turquoise
Potri.012G082200	Turquoise
Potri.012G087800	Turquoise
Potri.012G090300	Turquoise
Potri.012G109200	Turquoise
Potri.012G109600	Turquoise
Potri.012G111500	Turquoise
Potri.012G117800	Turquoise
Potri.012G118800	Turquoise
Potri.012G123700	Turquoise
Potri.012G127300	Turquoise
Potri.012G127700	Turquoise
Potri.012G132400	Turquoise
Potri.012G139100	Turquoise
Potri.012G140800	Turquoise
Potri.012G142300	Turquoise
Potri.012G142400	Turquoise
Potri.013G004100	Turquoise
Potri.013G004400	Turquoise
Potri.013G011100	Turquoise
Potri.013G023400	Turquoise
Potri.013G031400	Turquoise
Potri.013G031700	Turquoise
Potri.013G035500	Turquoise
Potri.013G043700	Turquoise
Potri.013G047200	Turquoise
Potri.013G049200	Turquoise
Potri.013G050900	Turquoise
Potri.013G055100	Turquoise
Potri.013G055300	Turquoise
Potri.013G060600	Turquoise
Potri.013G061800	Turquoise
Potri.013G066200	Turquoise
Potri.013G067300	Turquoise
Potri.013G068800	Turquoise
Potri.013G072600	Turquoise
Potri.013G073500	Turquoise
Potri.013G078600	Turquoise
Potri.013G081200	Turquoise
Potri.013G083800	Turquoise
Potri.013G086600	Turquoise
Potri.013G106000	Turquoise
Potri.013G113500	Turquoise
Potri.013G117100	Turquoise
Potri.013G117900	Turquoise
Potri.013G118000	Turquoise
Potri.013G123800	Turquoise
Potri.013G127200	Turquoise
Potri.013G130400	Turquoise
Potri.013G135200	Turquoise
Potri.013G155300	Turquoise
Potri.013G156200	Turquoise
Potri.014G000800	Turquoise
Potri.014G008400	Turquoise
Potri.014G014200	Turquoise
Potri.014G015600	Turquoise
Potri.014G017500	Turquoise
Potri.014G017600	Turquoise
Potri.014G021900	Turquoise
Potri.014G022600	Turquoise
Potri.014G024400	Turquoise
Potri.014G026100	Turquoise
Potri.014G029300	Turquoise
Potri.014G029900	Turquoise
Potri.014G040300	Turquoise
Potri.014G041000	Turquoise
Potri.014G043200	Turquoise
Potri.014G045500	Turquoise
Potri.014G047500	Turquoise
Potri.014G049400	Turquoise
Potri.014G049800	Turquoise
Potri.014G066100	Turquoise
Potri.014G066200	Turquoise
Potri.014G066600	Turquoise
Potri.014G068200	Turquoise
Potri.014G068400	Turquoise
Potri.014G069200	Turquoise
Potri.014G075700	Turquoise
Potri.014G076300	Turquoise
Potri.014G076500	Turquoise
Potri.014G076800	Turquoise
Potri.014G077900	Turquoise
Potri.014G079000	Turquoise
Potri.014G082100	Turquoise
Potri.014G084600	Turquoise
Potri.014G087200	Turquoise
Potri.014G090100	Turquoise
Potri.014G091200	Turquoise
Potri.014G091300	Turquoise
Potri.014G092300	Turquoise
Potri.014G094400	Turquoise
Potri.014G095800	Turquoise
Potri.014G096000	Turquoise
Potri.014G096100	Turquoise
Potri.014G098700	Turquoise
Potri.014G098900	Turquoise
Potri.014G099000	Turquoise
Potri.014G099200	Turquoise
Potri.014G100400	Turquoise
Potri.014G103600	Turquoise
Potri.014G108300	Turquoise
Potri.014G108600	Turquoise
Potri.014G114700	Turquoise
Potri.014G119900	Turquoise
Potri.014G125000	Turquoise
Potri.014G125700	Turquoise
Potri.014G128500	Turquoise
Potri.014G130000	Turquoise
Potri.014G131600	Turquoise
Potri.014G136300	Turquoise
Potri.014G139900	Turquoise
Potri.014G147000	Turquoise
Potri.014G149900	Turquoise
Potri.014G151300	Turquoise
Potri.014G153700	Turquoise
Potri.014G153900	Turquoise
Potri.014G156600	Turquoise
Potri.014G160400	Turquoise
Potri.014G161700	Turquoise
Potri.014G164400	Turquoise
Potri.014G167400	Turquoise
Potri.014G175100	Turquoise
Potri.014G181600	Turquoise
Potri.014G185300	Turquoise
Potri.014G189500	Turquoise
Potri.015G009200	Turquoise
Potri.015G012500	Turquoise
Potri.015G017500	Turquoise
Potri.015G029200	Turquoise
Potri.015G033600	Turquoise
Potri.015G034700	Turquoise
Potri.015G036800	Turquoise
Potri.015G039700	Turquoise
Potri.015G048100	Turquoise
Potri.015G049100	Turquoise
Potri.015G060100	Turquoise
Potri.015G060900	Turquoise
Potri.015G069200	Turquoise
Potri.015G071200	Turquoise
Potri.015G075200	Turquoise
Potri.015G077900	Turquoise
Potri.015G081000	Turquoise
Potri.015G081800	Turquoise
Potri.015G082700	Turquoise
Potri.015G092800	Turquoise
Potri.015G095100	Turquoise
Potri.015G096900	Turquoise
Potri.015G097400	Turquoise
Potri.015G101200	Turquoise
Potri.015G103400	Turquoise
Potri.015G105000	Turquoise
Potri.015G106200	Turquoise
Potri.015G121000	Turquoise
Potri.015G122500	Turquoise
Potri.015G124800	Turquoise
Potri.015G125100	Turquoise
Potri.015G128600	Turquoise
Potri.015G129100	Turquoise
Potri.015G135500	Turquoise
Potri.015G141400	Turquoise
Potri.015G142000	Turquoise
Potri.015G143600	Turquoise
Potri.015G147000	Turquoise
Potri.016G002700	Turquoise
Potri.016G006200	Turquoise
Potri.016G006400	Turquoise
Potri.016G006900	Turquoise
Potri.016G007100	Turquoise
Potri.016G010900	Turquoise
Potri.016G013000	Turquoise
Potri.016G013400	Turquoise
Potri.016G018700	Turquoise
Potri.016G022900	Turquoise
Potri.016G024800	Turquoise
Potri.016G025100	Turquoise
Potri.016G029100	Turquoise
Potri.016G033200	Turquoise
Potri.016G041000	Turquoise
Potri.016G041600	Turquoise
Potri.016G045300	Turquoise
Potri.016G051500	Turquoise
Potri.016G051900	Turquoise
Potri.016G052100	Turquoise
Potri.016G055700	Turquoise
Potri.016G056200	Turquoise
Potri.016G056500	Turquoise
Potri.016G066500	Turquoise
Potri.016G066600	Turquoise
Potri.016G071700	Turquoise
Potri.016G078200	Turquoise
Potri.016G086300	Turquoise
Potri.016G086400	Turquoise
Potri.016G087000	Turquoise
Potri.016G091100	Turquoise
Potri.016G097800	Turquoise
Potri.016G098400	Turquoise
Potri.016G099300	Turquoise
Potri.016G101900	Turquoise
Potri.016G104300	Turquoise
Potri.016G110200	Turquoise
Potri.016G110600	Turquoise
Potri.016G110900	Turquoise
Potri.016G111000	Turquoise
Potri.016G111800	Turquoise
Potri.016G113600	Turquoise
Potri.016G115300	Turquoise
Potri.016G119100	Turquoise
Potri.016G125500	Turquoise
Potri.016G126200	Turquoise
Potri.016G129900	Turquoise
Potri.016G134500	Turquoise
Potri.016G139500	Turquoise
Potri.016G143200	Turquoise
Potri.016G144000	Turquoise
Potri.017G000300	Turquoise
Potri.017G011400	Turquoise
Potri.017G012600	Turquoise
Potri.017G016700	Turquoise
Potri.017G026200	Turquoise
Potri.017G028500	Turquoise
Potri.017G029000	Turquoise
Potri.017G035800	Turquoise
Potri.017G036000	Turquoise
Potri.017G036300	Turquoise
Potri.017G043200	Turquoise
Potri.017G050700	Turquoise
Potri.017G054000	Turquoise
Potri.017G055000	Turquoise
Potri.017G057900	Turquoise
Potri.017G059300	Turquoise
Potri.017G059400	Turquoise
Potri.017G059500	Turquoise
Potri.017G069800	Turquoise
Potri.017G074400	Turquoise
Potri.017G075600	Turquoise
Potri.017G076500	Turquoise
Potri.017G079600	Turquoise
Potri.017G081600	Turquoise
Potri.017G082900	Turquoise
Potri.017G088700	Turquoise
Potri.017G097000	Turquoise
Potri.017G100100	Turquoise
Potri.017G116000	Turquoise
Potri.017G139700	Turquoise
Potri.017G139800	Turquoise
Potri.017G142300	Turquoise
Potri.017G148100	Turquoise
Potri.017G154200	Turquoise
Potri.018G000600	Turquoise
Potri.018G005600	Turquoise
Potri.018G014300	Turquoise
Potri.018G018600	Turquoise
Potri.018G019900	Turquoise
Potri.018G022400	Turquoise
Potri.018G024700	Turquoise
Potri.018G025000	Turquoise
Potri.018G026200	Turquoise
Potri.018G027500	Turquoise
Potri.018G032100	Turquoise
Potri.018G032600	Turquoise
Potri.018G034200	Turquoise
Potri.018G051100	Turquoise
Potri.018G052500	Turquoise
Potri.018G059100	Turquoise
Potri.018G062700	Turquoise
Potri.018G067700	Turquoise
Potri.018G080900	Turquoise
Potri.018G081300	Turquoise
Potri.018G083700	Turquoise
Potri.018G084100	Turquoise
Potri.018G090100	Turquoise
Potri.018G096700	Turquoise
Potri.018G103900	Turquoise
Potri.018G107600	Turquoise
Potri.018G108700	Turquoise
Potri.018G115100	Turquoise
Potri.018G121200	Turquoise
Potri.018G124900	Turquoise
Potri.018G125300	Turquoise
Potri.018G125400	Turquoise
Potri.018G127200	Turquoise
Potri.018G132300	Turquoise
Potri.018G132400	Turquoise
Potri.018G139200	Turquoise
Potri.018G143500	Turquoise
Potri.018G149400	Turquoise
Potri.019G002100	Turquoise
Potri.019G007500	Turquoise
Potri.019G008400	Turquoise
Potri.019G010400	Turquoise
Potri.019G014200	Turquoise
Potri.019G019800	Turquoise
Potri.019G032900	Turquoise
Potri.019G036700	Turquoise
Potri.019G037900	Turquoise
Potri.019G038200	Turquoise
Potri.019G039500	Turquoise
Potri.019G053300	Turquoise
Potri.019G053800	Turquoise
Potri.019G064100	Turquoise
Potri.019G076300	Turquoise
Potri.019G076900	Turquoise
Potri.019G077100	Turquoise
Potri.019G077300	Turquoise
Potri.019G079800	Turquoise
Potri.019G079900	Turquoise
Potri.019G104500	Turquoise
Potri.019G118400	Turquoise
Potri.019G126300	Turquoise
Potri.019G126400	Turquoise
Potri.019G127500	Turquoise
Potri.019G130000	Turquoise
Potri.T011400	Turquoise
Potri.T035900	Turquoise
Potri.T045400	Turquoise
Potri.T058500	Turquoise
Potri.T059900	Turquoise
Potri.T070100	Turquoise
Potri.T138300	Turquoise
Potri.T139600	Turquoise
Potri.T143600	Turquoise
Potri.T153900	Turquoise
XLOC_010176	Turquoise
XLOC_023279	Turquoise
XLOC_035744	Turquoise
XLOC_054071	Turquoise
XLOC_063378	Turquoise
XLOC_064046	Turquoise
XLOC_065058	Turquoise
XLOC_078442	Turquoise
XLOC_087698	Turquoise
Potri.002G008800	Yellow
Potri.002G059600	Yellow
Potri.005G078900	Yellow
Potri.005G211000	Yellow
Potri.006G067000	Yellow
Potri.008G152200	Yellow
Potri.010G015100	Yellow
Potri.010G088200	Yellow
Potri.010G147400	Yellow
Potri.011G007100	Yellow
Potri.011G166300	Yellow
Potri.012G103100	Yellow
Potri.012G119600	Yellow
Potri.014G124900	Yellow
Potri.015G132700	Yellow
Potri.019G009900	Yellow

## Sheet: Table S5
Xylem systems genetics analysis reveals a key regulator of lignin biosynthesis in Populus deltoides
Table S5 - Eigengene-based connectivities (kME) of genes present in the turquoise module. Genes with kME>0.7 are considered hub genes.
ID	MM.turquoise	local e-QTL
Potri.015G060100	0.921905
Potri.014G092300	0.913504
Potri.011G126300	0.890354
Potri.010G187600	0.888664
Potri.014G108300	0.888398
Potri.005G141300	0.873331
Potri.014G098700	0.872064
Potri.006G211200	0.869501
Potri.014G040300	0.868717
Potri.003G151700	0.867567
Potri.001G352300	0.863337
Potri.006G131000	0.863208
Potri.003G003700	0.861989
Potri.007G135300	0.861711
Potri.005G257800	0.860241
Potri.014G014200	0.857133
Potri.007G014800	0.855506
Potri.016G086400	0.855168
Potri.008G094700	0.854414
Potri.008G012400	0.853902
Potri.008G069900	0.853277
Potri.010G141600	0.844721
Potri.005G205700	0.842537
Potri.003G155200	0.842347
Potri.004G226800	0.840781
Potri.004G201600	0.840024
Potri.003G177700	0.838958
Potri.006G123200	0.83873
Potri.001G403600	0.838277
Potri.009G011100	0.837197
Potri.018G052500	0.837103
Potri.004G211900	0.835365
Potri.002G257900	0.832935
Potri.005G237700	0.831749
Potri.016G139500	0.829803
Potri.010G033400	0.829679
Potri.010G244900	0.828466
Potri.003G073500	0.825886
Potri.001G068100	0.825448
Potri.007G016400	0.825427	X
Potri.002G099200	0.825345
Potri.001G320800	0.824605
Potri.014G095800	0.823615
Potri.005G109600	0.820074
Potri.006G228600	0.820033
Potri.006G229300	0.819643
Potri.016G033200	0.81934
Potri.006G033300	0.817866
Potri.013G061800	0.817645
Potri.017G000300	0.816838
Potri.T059900	0.815755
Potri.007G107200	0.812087
Potri.019G002100	0.811819
Potri.010G193100	0.808335
Potri.001G127100	0.803328
Potri.013G157900	0.802441
Potri.015G069200	0.80033
Potri.002G064900	0.79917
Potri.018G103900	0.798463
Potri.011G061500	0.797456
Potri.010G095900	0.794784
Potri.005G186400	0.794303
Potri.006G104400	0.794027
Potri.002G256600	0.793159
Potri.001G121400	0.791634
Potri.008G026400	0.790777
Potri.006G129200	0.79068
Potri.001G320400	0.790626
Potri.002G146400	0.787647
Potri.010G013500	0.787103
Potri.010G076200	0.785424
Potri.008G006500	0.785063
Potri.004G118600	0.784547
Potri.005G117500	0.78323
Potri.010G132500	0.783154
Potri.007G047000	0.782851
Potri.010G252500	0.782452
Potri.003G122900	0.781871	X
Potri.014G068400	0.781252
Potri.009G009500	0.780844	X
Potri.005G226400	0.780437
Potri.017G016700	0.778648
Potri.003G059200	0.778566
Potri.015G077900	0.778398
Potri.016G110900	0.776472
Potri.019G076300	0.776468
Potri.001G320500	0.774243
Potri.006G005600	0.772568
Potri.001G059400	0.770375
Potri.009G006500	0.769922
Potri.010G198800	0.769691
Potri.006G181900	0.769122
Potri.015G135500	0.768929
Potri.001G190400	0.768341
Potri.015G049100	0.767856
Potri.004G067000	0.767707
Potri.013G066200	0.767212
Potri.002G168400	0.766945
Potri.005G079200	0.76601	X
Potri.007G047500	0.765692
Potri.004G207500	0.765365
Potri.013G073500	0.764734
Potri.011G079400	0.764553
Potri.001G237200	0.764406
Potri.011G122700	0.76439
Potri.008G038100	0.764177
Potri.008G198100	0.76354
Potri.001G333200	0.762692
Potri.008G178600	0.761564
Potri.017G026200	0.761336
Potri.006G200300	0.760514
Potri.001G416800	0.759123
Potri.002G036400	0.758821
Potri.001G279500	0.758731
Potri.009G075300	0.758708
Potri.015G142000	0.757635
Potri.015G012500	0.754864
Potri.003G120000	0.752428
Potri.010G252400	0.751377
Potri.006G224800	0.749583
Potri.012G016200	0.74894
Potri.011G096500	0.747793
Potri.012G006400	0.746754
Potri.014G068200	0.746202
Potri.018G034200	0.745668
Potri.014G114700	0.744635
Potri.016G055700	0.744558	X
Potri.001G112000	0.744166
Potri.009G067200	0.74358
Potri.011G069600	0.743329
Potri.009G075600	0.743216
Potri.009G013500	0.742873
Potri.013G127200	0.741612
Potri.001G231000	0.740911
Potri.001G300900	0.740826
Potri.010G105900	0.740635	X
Potri.001G370800	0.738174
Potri.001G036900	0.737932
Potri.010G231000	0.737691
Potri.008G038200	0.737191
Potri.017G029000	0.736285
Potri.005G061600	0.7361
Potri.015G060900	0.736086
Potri.011G132600	0.732154	X
Potri.006G119400	0.731626
Potri.014G147000	0.731279
Potri.004G001800	0.73106
Potri.012G123700	0.730634
Potri.004G142800	0.7299
Potri.010G224100	0.727435
Potri.001G087800	0.727344
Potri.017G059400	0.726605
Potri.009G011000	0.725933
Potri.006G150900	0.725442
Potri.017G059300	0.724664
Potri.001G209400	0.724398
Potri.001G371200	0.722359
Potri.016G125500	0.722247
Potri.017G035800	0.719704
Potri.017G081600	0.719375
Potri.002G254600	0.718006
Potri.006G136700	0.717505
Potri.008G099300	0.717357
Potri.015G129100	0.714093
Potri.015G101200	0.713725
Potri.016G066500	0.713266	X
Potri.012G015500	0.71256
Potri.004G159300	0.712102
Potri.008G008300	0.711138
Potri.001G107000	0.711098
Potri.011G135300	0.710225
Potri.017G082900	0.709043
Potri.018G125300	0.708812
Potri.007G098500	0.708392
Potri.008G112300	0.707708
Potri.003G114100	0.707383	X
Potri.014G119900	0.707197
Potri.003G074700	0.707108
Potri.013G130400	0.706407
Potri.007G021000	0.706318
Potri.017G079600	0.705133
Potri.016G029100	0.703195
Potri.008G018400	0.702871
Potri.013G083800	0.701931	X
Potri.001G410700	0.700998
Potri.001G138400	0.700723
Potri.001G218100	0.700661
Potri.014G151300	0.700002
Potri.012G111500	0.698981
Potri.009G026000	0.698444
Potri.T139600	0.698335
Potri.008G182700	0.698244
Potri.006G087100	0.697956
Potri.003G090300	0.697517
Potri.007G013900	0.695707
Potri.001G304800	0.695181
Potri.006G234100	0.694806
Potri.009G148800	0.694684
Potri.005G137500	0.694658
Potri.006G036300	0.694347
Potri.011G007200	0.694233
Potri.001G375700	0.694217
Potri.017G075600	0.694194
Potri.014G100400	0.693295	X
Potri.002G031000	0.693115
Potri.001G280400	0.693064
Potri.019G053300	0.692805
Potri.011G132500	0.689168
Potri.007G014400	0.689089
Potri.003G118000	0.688601
Potri.003G192900	0.6879
Potri.002G109200	0.687648	X
Potri.014G153700	0.687613
Potri.002G055200	0.686978	X
Potri.011G143400	0.686322
Potri.002G034400	0.686315
Potri.016G111000	0.685129
Potri.005G110900	0.684027
Potri.005G065200	0.683018
Potri.016G006900	0.682579
Potri.015G128600	0.682257
Potri.018G081300	0.681967
Potri.002G111900	0.681598
Potri.002G228900	0.68101
Potri.008G226200	0.680783
Potri.003G164200	0.680151
Potri.002G242500	0.679991
Potri.016G119100	0.679934
Potri.006G230800	0.679608
Potri.004G081100	0.679499	X
Potri.010G146900	0.679318
Potri.005G236200	0.678492
Potri.007G081000	0.677659
Potri.003G047700	0.677501
Potri.006G279600	0.67744
Potri.014G094400	0.677413
Potri.006G049700	0.675629
Potri.003G126800	0.67519
Potri.014G066600	0.674185
Potri.014G029900	0.674083
Potri.006G139500	0.674064	X
Potri.016G006200	0.673812
Potri.016G086300	0.672125
Potri.002G176800	0.670942
Potri.003G082500	0.670878
Potri.010G184000	0.670824
Potri.002G101800	0.670702
Potri.008G192100	0.669417	X
Potri.003G141100	0.669132
Potri.009G147500	0.668934
Potri.010G029200	0.668486
Potri.009G085100	0.668421
Potri.015G122500	0.668021
Potri.006G050200	0.66798	X
Potri.015G096900	0.667676
Potri.004G009600	0.665614
Potri.014G015600	0.665136
Potri.001G272700	0.664937
Potri.015G034700	0.663405
Potri.016G024800	0.663265
Potri.015G092800	0.663247
Potri.006G263000	0.662921
Potri.001G112200	0.660342
Potri.018G096700	0.660244
Potri.010G223300	0.659932
Potri.007G116400	0.658938
Potri.006G237700	0.658777
Potri.011G004700	0.658717
Potri.015G036800	0.657487
Potri.016G051900	0.657391
Potri.013G155300	0.655166	X
Potri.010G108100	0.654458
Potri.016G134500	0.654418
Potri.009G160200	0.654072
Potri.002G191400	0.653756
Potri.004G007600	0.65366	X
Potri.008G068400	0.653442
Potri.005G230900	0.652616
Potri.015G141400	0.65235
Potri.T058500	0.65127
Potri.001G295800	0.650587
Potri.002G145900	0.649782	X
Potri.003G117100	0.649764
Potri.012G058900	0.649528
Potri.002G243000	0.649301
Potri.006G278700	0.648645	X
Potri.001G188800	0.648297
Potri.006G220700	0.648109
Potri.001G142100	0.647899
Potri.003G220300	0.647419
Potri.012G142300	0.646596
Potri.010G221600	0.645994
Potri.005G144600	0.645638
Potri.016G066600	0.645373
Potri.003G198100	0.644447
Potri.009G069500	0.644168
Potri.001G104600	0.64398
Potri.014G021900	0.643513
Potri.010G159300	0.643315
Potri.005G141500	0.64256
Potri.002G016500	0.642538
Potri.006G018000	0.640625
Potri.001G175000	0.63905
Potri.002G231100	0.637667
Potri.010G249600	0.637578
Potri.003G181400	0.636652
Potri.017G139800	0.636433
Potri.005G182800	0.63582
Potri.001G468700	0.635777	X
Potri.001G047100	0.63515
Potri.010G249900	0.634404
Potri.005G114500	0.634359
Potri.004G020700	0.630592
Potri.009G024700	0.630585
Potri.014G045500	0.629958
Potri.001G140900	0.629241
Potri.014G103600	0.628482
Potri.008G029800	0.627686
Potri.002G064800	0.625781
Potri.009G099800	0.625738
Potri.001G257100	0.624826
Potri.001G075600	0.623868
Potri.003G130700	0.623839
Potri.014G128500	0.623243
Potri.018G025000	0.623023
Potri.005G242700	0.622942
Potri.006G051700	0.62266
Potri.002G133100	0.62266
Potri.008G038900	0.621803
Potri.003G136000	0.62151	X
Potri.013G067300	0.621342
Potri.012G140800	0.62005
Potri.005G250800	0.620047
Potri.006G051000	0.620027
Potri.010G157600	0.619507
Potri.012G127700	0.61902	X
Potri.002G122000	0.618052
Potri.008G176900	0.617262
Potri.005G102100	0.617062
Potri.001G403700	0.616858
Potri.017G074400	0.615743
Potri.003G183700	0.615238
Potri.018G139200	0.614812
Potri.001G309500	0.614679
Potri.008G054400	0.614654
Potri.005G148800	0.614621
Potri.010G125200	0.614229
Potri.013G123800	0.613612
Potri.002G184900	0.613549	X
Potri.016G087000	0.613315
Potri.008G030200	0.611985
Potri.006G092600	0.610305
Potri.002G261700	0.610269
Potri.002G223300	0.609988
Potri.012G080000	0.609375
Potri.006G001500	0.608896
Potri.002G011800	0.608425
Potri.013G004100	0.608279	X
Potri.014G098900	0.607556	X
Potri.010G236700	0.607552
Potri.004G228400	0.607211
Potri.010G229600	0.606907
Potri.005G145300	0.605448	X
Potri.011G156100	0.603475
Potri.010G067100	0.602465	X
Potri.005G176500	0.601841
Potri.006G077900	0.601524
Potri.013G081200	0.601355
Potri.009G027900	0.601276
Potri.014G066200	0.601182
Potri.011G094900	0.600358
Potri.010G234100	0.600109
Potri.002G103800	0.599586
Potri.002G005700	0.599394	X
Potri.019G076900	0.598992	X
Potri.008G170800	0.597955
Potri.013G117900	0.597458	X
Potri.014G075700	0.597423	X
Potri.014G017500	0.597065
Potri.009G152800	0.596754	X
Potri.015G009200	0.59579
Potri.016G143200	0.595692
Potri.011G066100	0.595391
Potri.001G005500	0.595237
Potri.011G153700	0.593109	X
Potri.003G084100	0.592871
Potri.019G038200	0.592578
Potri.006G072300	0.591637
Potri.014G022600	0.591089
Potri.011G111700	0.587977
Potri.014G185300	0.587241	X
Potri.013G156200	0.58605	X
Potri.007G128600	0.585531
Potri.005G070400	0.585345
Potri.003G142600	0.584772
Potri.018G059100	0.58459
Potri.007G032700	0.584401
Potri.001G018700	0.583445	X
Potri.011G057400	0.583258
Potri.006G061700	0.582163
Potri.004G173800	0.581324
Potri.001G118800	0.581266
Potri.008G073300	0.580326
Potri.010G148500	0.580168
Potri.011G015600	0.579942
Potri.004G158400	0.579756
Potri.008G116400	0.579416
Potri.001G009100	0.579382
Potri.019G130700	0.579351
Potri.004G039100	0.577887
Potri.002G101300	0.577416
Potri.005G249600	0.575233
Potri.001G052100	0.574787	X
Potri.017G012600	0.573872	X
Potri.007G139200	0.572818
Potri.010G076500	0.572226
Potri.006G108300	0.570917
Potri.004G211800	0.570788	X
Potri.019G130000	0.570718
Potri.003G161900	0.57036
Potri.012G109200	0.570229	X
Potri.010G160500	0.569592
Potri.001G272800	0.568887
Potri.016G045300	0.568439
Potri.006G248700	0.566491	X
Potri.009G074300	0.566076	X
Potri.003G221000	0.565798
Potri.008G060100	0.564093
Potri.001G073900	0.563679
Potri.002G251600	0.563664
Potri.018G090100	0.563351
Potri.001G133200	0.562848	X
Potri.009G034700	0.562732
Potri.013G004400	0.562607	X
Potri.010G122800	0.562579
Potri.001G142600	0.562043
Potri.009G051800	0.562039
Potri.002G253200	0.561932
Potri.014G131600	0.561856	X
Potri.003G220900	0.561727
Potri.018G062700	0.560601
Potri.010G065200	0.560222
Potri.014G125700	0.560211
Potri.017G088700	0.560033
Potri.016G129900	0.559589
Potri.001G213600	0.559553
Potri.018G149400	0.559335
Potri.006G090100	0.559137
Potri.010G133900	0.558577
Potri.004G048200	0.557999
Potri.012G082200	0.557558
Potri.008G221400	0.557432
Potri.013G050900	0.55733
Potri.014G181600	0.556944
Potri.013G086600	0.556852
Potri.001G206800	0.556428
Potri.012G127300	0.555801
Potri.001G157700	0.554538
Potri.019G077100	0.554279
Potri.009G168800	0.553803
Potri.008G041300	0.553723
Potri.019G126300	0.553261
Potri.001G227000	0.549961
Potri.014G049400	0.549217
Potri.005G165500	0.548552
Potri.008G034500	0.548012
Potri.015G103400	0.547882
Potri.002G089300	0.547755
Potri.008G144600	0.546744
Potri.001G190800	0.546733
Potri.012G139100	0.546696
Potri.010G224300	0.546176	X
Potri.004G071000	0.5461
Potri.010G236100	0.545687
Potri.009G095800	0.545122
Potri.012G080100	0.544887	X
Potri.016G101900	0.544488
Potri.005G033600	0.544033
Potri.004G013400	0.543481
Potri.012G109600	0.542738
Potri.014G091300	0.542703
Potri.002G132900	0.540509
Potri.001G062700	0.540431
Potri.016G022900	0.539976
Potri.001G108700	0.539218
Potri.004G168000	0.537808
Potri.007G131600	0.537049
Potri.002G108000	0.536601
Potri.T011400	0.536466
Potri.015G033600	0.536092
Potri.016G051500	0.535856
Potri.018G108700	0.535453
Potri.014G161700	0.53516
Potri.006G096800	0.534112	X
Potri.014G076300	0.533526
Potri.002G173400	0.533251
Potri.011G129900	0.533074
Potri.002G023000	0.533065
Potri.002G113100	0.532947
Potri.014G156600	0.532209
Potri.006G232900	0.531757
Potri.002G101200	0.531731
Potri.008G092700	0.530165
Potri.010G221700	0.529998
Potri.008G092500	0.529723	X
Potri.004G105500	0.529612
Potri.014G000800	0.528782
Potri.015G105000	0.52821	X
Potri.T070100	0.528168
Potri.006G107300	0.527984
Potri.017G036300	0.527535
Potri.004G028900	0.527317
Potri.006G056100	0.526991
Potri.005G226600	0.526837
Potri.005G206600	0.525852
Potri.006G252100	0.525652
Potri.001G335100	0.525641
Potri.001G267300	0.525517
Potri.004G188100	0.524817	X
Potri.006G069700	0.524686
Potri.015G081000	0.524273
Potri.004G040100	0.524256
Potri.007G046100	0.52398
Potri.003G018500	0.523764
Potri.018G125400	0.523553
Potri.009G146700	0.523547
Potri.009G120000	0.522102
Potri.010G241800	0.521679
Potri.004G161300	0.520951
Potri.019G010400	0.519715
Potri.003G188500	0.519553	X
Potri.012G061000	0.517941
Potri.010G216200	0.517474
Potri.006G233300	0.51633
Potri.004G143200	0.516116
Potri.003G183900	0.515921	X
Potri.003G100200	0.515731
Potri.003G138100	0.515592	X
Potri.010G003100	0.515419
Potri.016G007100	0.514941
Potri.017G057900	0.514804
Potri.008G095000	0.514724
Potri.005G038800	0.514414
Potri.010G250600	0.514121
Potri.007G033600	0.513976
Potri.005G260000	0.513623
Potri.016G144000	0.511986
Potri.001G248800	0.511794
Potri.013G055100	0.511247	X
Potri.006G246600	0.510151
Potri.001G232200	0.50867
Potri.003G205400	0.50835
Potri.007G078500	0.508174
Potri.018G115100	0.507764
Potri.008G083900	0.507698
Potri.005G083000	0.507428
Potri.008G018600	0.507246
Potri.008G202300	0.507232
Potri.001G117900	0.506521
Potri.002G171500	0.506471
Potri.019G008400	0.506465
Potri.010G036200	0.505855
Potri.T138300	0.505802
Potri.007G085900	0.505579
Potri.010G175000	0.505083
Potri.008G087600	0.504889
Potri.008G172400	0.504883
Potri.001G333300	0.503977	X
Potri.004G078800	0.503662
Potri.001G174900	0.503347
Potri.013G055300	0.503282
Potri.005G237100	0.50291
Potri.016G091100	0.502653
Potri.007G003200	0.501927
Potri.009G021800	0.501921	X
Potri.010G100200	0.501544
Potri.015G143600	0.501435	X
Potri.014G167400	0.501334
Potri.010G169200	0.50105
Potri.001G150600	0.500979
Potri.015G048100	0.500739
Potri.003G157100	0.500726
Potri.005G184400	0.499932
Potri.008G064000	0.499582
Potri.001G378500	0.499502	X
Potri.011G131900	0.499059
Potri.009G119500	0.498989
Potri.005G196500	0.49876
Potri.003G080100	0.498194	X
Potri.005G162800	0.498012
Potri.006G263500	0.497711
Potri.018G005600	0.497662	X
Potri.006G185600	0.497462
Potri.009G129500	0.497134	X
Potri.006G121200	0.496761
Potri.011G167000	0.496326	X
Potri.013G031400	0.496128
Potri.005G126200	0.495617
Potri.004G099100	0.494962
Potri.014G136300	0.49477
Potri.006G096900	0.494139
Potri.001G158900	0.494046	X
Potri.005G099900	0.494016
Potri.014G090100	0.49396
Potri.014G082100	0.493874
Potri.016G013000	0.492991
Potri.008G007000	0.491004	X
Potri.005G253700	0.490612
Potri.003G119400	0.49054
Potri.008G056100	0.49019
Potri.017G055000	0.489488
Potri.013G060600	0.489391	X
Potri.005G199600	0.489268	X
Potri.002G085300	0.488979
Potri.015G075200	0.488415
Potri.018G032600	0.487145	X
Potri.014G139900	0.486187
Potri.004G190800	0.484877
Potri.005G020400	0.484698
Potri.007G063000	0.484022
Potri.014G079000	0.483182	X
Potri.018G121200	0.4819
Potri.001G358200	0.481826
Potri.016G006400	0.481699
Potri.014G108600	0.481605
Potri.002G071900	0.481551	X
Potri.012G034400	0.478596
Potri.001G236100	0.476661
Potri.016G052100	0.476403	X
Potri.004G161400	0.476386	X
Potri.004G055000	0.475668
Potri.008G057300	0.475569
Potri.001G275800	0.475064
Potri.007G128800	0.474966
Potri.008G136600	0.47326	X
Potri.012G071700	0.472908
Potri.003G106600	0.472509
Potri.016G115300	0.471845
Potri.014G125000	0.471294
Potri.018G143500	0.470898
Potri.006G066600	0.470871
Potri.002G067800	0.470757
Potri.013G068800	0.46962
Potri.012G066200	0.469466	X
Potri.005G157500	0.469261
Potri.015G082700	0.468617
Potri.006G240200	0.468435	X
Potri.016G025100	0.46799
Potri.002G077900	0.467746
Potri.018G084100	0.467271
Potri.009G070400	0.467151	X
Potri.014G096100	0.466959
Potri.004G126500	0.466628
Potri.008G041800	0.466359
Potri.012G142400	0.465985
Potri.012G117800	0.46596
Potri.014G091200	0.465857
Potri.006G188100	0.464724
Potri.009G134600	0.464702
Potri.003G050100	0.463629
Potri.001G000900	0.46337
Potri.002G252600	0.463151
Potri.019G104500	0.463139
Potri.009G164300	0.462827
Potri.001G090300	0.462096
Potri.004G029600	0.461707	X
Potri.002G090700	0.46168
Potri.017G139700	0.460965
Potri.017G116000	0.460693	X
Potri.002G231800	0.460602
Potri.001G075700	0.460215
Potri.004G013800	0.460025
Potri.005G218900	0.459442
Potri.014G066100	0.458973
Potri.001G157800	0.458613
Potri.010G187500	0.458161
Potri.018G000600	0.457707
Potri.018G083700	0.457677
Potri.003G097300	0.457477
Potri.002G168300	0.457421	X
Potri.010G162400	0.456593	X
Potri.006G199000	0.456461
Potri.014G076500	0.455689
Potri.002G233400	0.455509
Potri.018G032100	0.454914
Potri.010G038400	0.454636	X
Potri.002G008600	0.454576
Potri.008G149300	0.454262
Potri.018G127200	0.454077
Potri.004G053000	0.453525
Potri.007G051000	0.453285
Potri.008G069100	0.453271
Potri.001G030100	0.452261
Potri.001G231600	0.450928
Potri.001G354700	0.449097
Potri.009G030100	0.44885
Potri.004G212600	0.448397	X
Potri.002G052800	0.448303
Potri.005G021200	0.44824
Potri.001G399500	0.446848
Potri.001G026400	0.446687	X
Potri.002G041700	0.446014	X
Potri.001G026600	0.445933
Potri.015G017500	0.445843	X
Potri.002G165900	0.444321
Potri.002G023900	0.443786
Potri.012G087800	0.443709
Potri.005G178200	0.443464
Potri.006G254400	0.443109
Potri.008G025300	0.442567
Potri.002G189000	0.442271
Potri.007G097600	0.442035
Potri.002G242900	0.441173
Potri.011G058100	0.440763
Potri.017G100100	0.440536
Potri.014G024400	0.440126	X
Potri.010G028700	0.437632
Potri.017G142300	0.437441
Potri.001G215400	0.436965
Potri.006G140700	0.436932
Potri.015G125100	0.436904
Potri.002G084900	0.436815	X
Potri.001G037400	0.436635
Potri.007G139800	0.436516
Potri.009G028000	0.43617	X
Potri.013G118000	0.43499
Potri.010G022300	0.434432
Potri.019G019800	0.434307	X
Potri.006G026500	0.433461	X
Potri.007G121500	0.432489
Potri.014G049800	0.432482
Potri.006G278100	0.432412
Potri.T143600	0.432309
Potri.002G253500	0.432294
Potri.015G097400	0.432232	X
Potri.007G047700	0.432069
Potri.001G310100	0.431505
Potri.004G186900	0.430361
Potri.016G018700	0.430293	X
Potri.005G241200	0.430178	X
Potri.008G145900	0.429783
XLOC_023279	0.429701
Potri.018G014300	0.428922
Potri.008G002300	0.428417
Potri.007G011700	0.428337
Potri.001G302000	0.428268
Potri.016G041600	0.427025	X
Potri.001G404500	0.426847
Potri.015G124800	0.426492
Potri.014G175100	0.426335
Potri.002G118700	0.424304
Potri.014G084600	0.423505	X
Potri.014G096000	0.423444
Potri.011G071900	0.422829
Potri.005G053500	0.42248
Potri.014G026100	0.421088
Potri.007G122600	0.420853	X
Potri.003G071500	0.420641
Potri.006G131400	0.42061
Potri.014G189500	0.420347
Potri.002G125800	0.419808
Potri.004G211000	0.419571
Potri.013G011100	0.418383
Potri.004G200500	0.418194
Potri.014G153900	0.417941
Potri.001G399700	0.417284
Potri.009G017300	0.417075
Potri.002G238600	0.416863	X
Potri.001G143600	0.416461
Potri.002G257800	0.416273
XLOC_035744	0.416206
Potri.012G023400	0.414693
Potri.009G018900	0.414113	X
Potri.010G038300	0.413948
Potri.006G122300	0.413817
Potri.008G167800	0.413709
Potri.004G036400	0.413257	X
Potri.013G078600	0.413165
Potri.005G071400	0.413044
Potri.016G078200	0.412997
Potri.002G160700	0.41291
Potri.013G106000	0.4129
Potri.006G137700	0.412878
Potri.008G038800	0.412503
Potri.014G076800	0.412002
Potri.001G327300	0.41151
Potri.003G115000	0.411412
Potri.019G127500	0.41117	X
Potri.010G042200	0.411013
Potri.003G124400	0.410987
Potri.013G035500	0.409623
Potri.001G472000	0.409182
Potri.010G079000	0.409042	X
XLOC_054071	0.408627
Potri.017G069800	0.408523
Potri.006G226900	0.40808
Potri.015G081800	0.407233
Potri.002G119800	0.406807	X
Potri.008G111900	0.406102
Potri.001G256300	0.405942
Potri.002G127700	0.405787	X
Potri.004G097500	0.405522
Potri.001G114600	0.405307
Potri.014G087200	0.404268
Potri.010G242700	0.404128
Potri.001G326600	0.404043	X
Potri.014G029300	0.403696
Potri.008G012000	0.403501
Potri.016G113600	0.402724
Potri.004G135000	0.402549	X
Potri.010G127500	0.402432
Potri.005G244500	0.402159
Potri.016G010900	0.401399
Potri.004G069600	0.401321
Potri.004G070000	0.401124
Potri.018G018600	0.40051	X
Potri.005G074100	0.400449
Potri.005G141600	0.400024	X
Potri.001G225200	0.399751
Potri.013G135200	0.399503
Potri.007G006900	0.399096
Potri.008G202600	0.398561
Potri.004G213300	0.398057	X
Potri.002G165400	0.397836	X
Potri.008G134900	0.397331
Potri.015G121000	0.396956
Potri.014G099200	0.396574
Potri.003G054800	0.395446
Potri.014G164400	0.395361
Potri.008G142800	0.394954
Potri.006G036200	0.394441
Potri.012G039400	0.394169
Potri.003G186400	0.393322
Potri.011G097100	0.39271
Potri.008G115700	0.392247
Potri.006G201600	0.392008
Potri.007G024300	0.391737
Potri.013G117100	0.391464	X
Potri.011G011100	0.390482
XLOC_065058	0.390198
Potri.016G056200	0.39002
Potri.005G150000	0.389914
Potri.001G087200	0.389519
Potri.018G132400	0.388531
Potri.006G131300	0.388468
Potri.004G163400	0.387943
Potri.013G023400	0.387114
Potri.004G184200	0.386814
Potri.014G130000	0.386605
Potri.002G079600	0.385446
Potri.018G019900	0.38528
Potri.007G017900	0.385178	X
Potri.013G031700	0.384925
Potri.005G245600	0.384886	X
Potri.003G132400	0.383936
Potri.009G047300	0.383234
Potri.014G047500	0.382675
Potri.T035900	0.3823
Potri.004G203400	0.381126
Potri.001G343500	0.381036
Potri.001G033600	0.37993
XLOC_087698	0.379856
Potri.015G029200	0.37984
Potri.012G080700	0.379753
Potri.017G036000	0.378607	X
Potri.013G049200	0.37837
Potri.002G031900	0.378161
Potri.001G177400	0.377173
Potri.010G205000	0.376858
Potri.010G156600	0.376391	X
Potri.003G127100	0.376235
Potri.019G079800	0.37587
Potri.016G111800	0.375461
Potri.002G045000	0.375339
Potri.005G102000	0.375282
Potri.002G104200	0.375091
Potri.011G045300	0.375048
Potri.016G097800	0.374496	X
Potri.019G079900	0.373764
Potri.003G117000	0.37351
Potri.006G261700	0.373485
Potri.008G148300	0.372706
Potri.009G119700	0.372668
Potri.002G057700	0.37263	X
Potri.004G126600	0.372114	X
Potri.011G023200	0.371706
Potri.010G184100	0.371669
Potri.009G115600	0.37163
Potri.012G006500	0.3713
Potri.015G095100	0.371127
Potri.007G099800	0.37086
Potri.009G042600	0.370263	X
Potri.002G216000	0.369703
Potri.017G054000	0.368969	X
Potri.016G013400	0.368925
Potri.007G006400	0.368747	X
Potri.007G124000	0.368528	X
Potri.017G050700	0.368508
Potri.006G090300	0.368381
Potri.012G032200	0.368072
Potri.007G011000	0.367765
Potri.012G036600	0.36659	X
Potri.002G074400	0.366283
Potri.004G065900	0.365879
Potri.002G134200	0.365457
Potri.011G149200	0.365315
Potri.006G126800	0.365313	X
Potri.005G074700	0.364186
Potri.008G128000	0.364046
Potri.005G117200	0.363431
Potri.008G039700	0.36331
Potri.008G199100	0.362972
Potri.010G028900	0.362711	X
Potri.018G080900	0.362617
Potri.016G110600	0.361688
Potri.004G218200	0.361476
XLOC_078442	0.361066
Potri.016G110200	0.360682
Potri.002G217200	0.360584
Potri.006G225500	0.36051
Potri.012G090300	0.360218
Potri.009G024000	0.360067
Potri.006G232700	0.358954	X
Potri.001G273000	0.35856	X
Potri.015G039700	0.358456
Potri.001G163100	0.358403
Potri.004G075800	0.358209	X
Potri.002G249600	0.357644	X
Potri.003G064900	0.357022
Potri.006G128000	0.3568
Potri.006G193500	0.356596
Potri.008G073200	0.356575
Potri.008G009500	0.356491
Potri.018G051100	0.356415	X
Potri.007G039500	0.356337
Potri.002G111800	0.355382
Potri.017G076500	0.35496	X
Potri.002G004600	0.354893
Potri.005G126500	0.354629
Potri.008G204800	0.354536
Potri.012G118800	0.354154	X
Potri.006G025800	0.353438
Potri.007G105600	0.352948
Potri.010G205100	0.352851
Potri.007G134500	0.352803
Potri.002G217000	0.352748	X
Potri.007G008600	0.352526
Potri.001G399900	0.351654
Potri.008G161200	0.351013
Potri.017G097000	0.350721	X
Potri.005G075900	0.35038	X
Potri.010G028800	0.349907
Potri.002G113300	0.349119
Potri.011G001600	0.34883
Potri.017G011400	0.348551
Potri.019G036700	0.348495
Potri.008G208200	0.348492
Potri.016G056500	0.348358
Potri.019G077300	0.348315
Potri.002G094700	0.347726
Potri.010G191100	0.347384
Potri.009G161400	0.347145	X
Potri.006G167200	0.347124
Potri.005G063200	0.346917
Potri.018G107600	0.346773
Potri.017G059500	0.346247
Potri.008G029600	0.345259
Potri.009G169800	0.344889
Potri.003G097400	0.344242	X
Potri.010G225300	0.344204	X
Potri.006G187400	0.344164
Potri.014G041000	0.343544
Potri.008G103500	0.343444
Potri.006G204400	0.343378
Potri.010G216600	0.34329
Potri.003G212400	0.343073	X
Potri.010G212900	0.343048
Potri.006G051500	0.342792
Potri.018G027500	0.341692
Potri.019G118400	0.341497	X
Potri.006G099600	0.341325
Potri.001G416600	0.340754
Potri.011G041100	0.340574
Potri.018G024700	0.340541
Potri.004G137200	0.340523
Potri.019G037900	0.339558
Potri.005G045500	0.338797
Potri.010G153400	0.337873
Potri.003G163000	0.337866
Potri.003G133400	0.337552
Potri.002G187600	0.337129
Potri.016G071700	0.337065
Potri.012G132400	0.33689
Potri.001G356100	0.336684
Potri.001G208800	0.335637
Potri.006G000300	0.335076	X
Potri.012G069900	0.334592
Potri.018G124900	0.33458
Potri.004G174400	0.334576
Potri.001G138000	0.33326
Potri.014G149900	0.332993
Potri.018G132300	0.332805
Potri.004G138000	0.332486
Potri.003G183200	0.3315
Potri.005G206800	0.331239
Potri.016G002700	0.330549
Potri.007G058400	0.330113
Potri.002G158500	0.330071	X
Potri.011G057200	0.32983
Potri.008G074800	0.329339
Potri.001G306200	0.328868	X
Potri.006G135800	0.328749	X
Potri.014G099000	0.328275
Potri.003G034900	0.328067
Potri.017G154200	0.327497
Potri.001G424500	0.327415	X
Potri.007G051100	0.327377	X
Potri.002G173200	0.326668
Potri.003G131600	0.32646	X
Potri.002G014500	0.326197	X
Potri.001G023800	0.325954
Potri.014G017600	0.32545
Potri.008G034600	0.324204
Potri.014G077900	0.323518
Potri.015G147000	0.323472
Potri.004G223100	0.323206
Potri.007G130300	0.321503
Potri.018G146100	0.321314
Potri.002G071400	0.320098	X
Potri.001G000700	0.319617
Potri.007G065800	0.318903	X
Potri.019G039500	0.317822	X
Potri.010G101400	0.317751
Potri.004G129900	0.316881
Potri.003G086700	0.316619
Potri.006G108200	0.316616
Potri.008G064200	0.316357	X
Potri.004G062500	0.313843
Potri.013G072600	0.313549	X
Potri.014G008400	0.31342
Potri.005G108700	0.313058
Potri.006G011600	0.312435	X
Potri.010G185100	0.311981
XLOC_064046	0.31149
Potri.014G043200	0.309738
Potri.010G098300	0.309297
Potri.019G032900	0.309082	X
Potri.018G067700	0.308733
Potri.002G153700	0.308543
Potri.006G237100	0.307718
Potri.017G043200	0.307356
Potri.006G060700	0.306485	X
Potri.006G217000	0.306313
Potri.003G053400	0.306093
Potri.001G392200	0.306042
Potri.018G022400	0.30564
Potri.019G007500	0.305157
Potri.015G071200	0.30267
Potri.003G132100	0.302549
Potri.015G106200	0.302141
Potri.007G129900	0.302064
Potri.001G348500	0.301315
Potri.019G126400	0.300819	X
Potri.007G028900	0.300674
Potri.003G128600	0.299602
Potri.008G093100	0.299371
Potri.006G265800	0.299212	X
Potri.001G135100	0.298319
Potri.005G033500	0.297972
Potri.006G227100	0.297536
Potri.001G435400	0.296623
Potri.003G187500	0.296601
Potri.017G148100	0.295827	X
Potri.019G014200	0.295357
Potri.001G165600	0.293435
Potri.010G097900	0.292088
Potri.009G006900	0.291901	X
Potri.009G134000	0.289708
Potri.018G026200	0.288958
XLOC_010176	0.28629
Potri.012G032000	0.285781
Potri.004G175400	0.283744
Potri.009G135300	0.283361
Potri.013G043700	0.28234
Potri.T045400	0.282248
Potri.002G102800	0.282113
Potri.004G211400	0.281489	X
Potri.014G069200	0.280352	X
Potri.016G126200	0.28023
Potri.006G169600	0.279403
Potri.016G041000	0.278858
Potri.006G055400	0.278543
Potri.016G099300	0.278502
Potri.016G098400	0.278389
Potri.019G064100	0.274596
Potri.017G028500	0.273918
Potri.002G204000	0.268692	X
Potri.003G198200	0.268661
Potri.005G205300	0.267224
Potri.016G104300	0.265691
Potri.002G249400	0.265655
Potri.010G058700	0.265479
Potri.001G059800	0.265224	X
Potri.005G108000	0.264444
Potri.013G113500	0.263242
Potri.010G065900	0.260013
Potri.010G003600	0.259839
Potri.006G255200	0.259726
Potri.011G043800	0.258769
Potri.006G218400	0.257262	X
Potri.002G213600	0.256711	X
Potri.003G116500	0.255993
Potri.002G061900	0.254876	X
Potri.T153900	0.253642
Potri.010G031600	0.251367
Potri.007G070900	0.250963
Potri.013G047200	0.250353
Potri.012G016000	0.249889	X
Potri.004G015700	0.248719
Potri.008G065200	0.245155
Potri.002G114700	0.244676
Potri.007G129700	0.244649
Potri.019G053800	0.242937
Potri.008G028800	0.241384
Potri.010G172400	0.240297
Potri.002G225800	0.239208	X
Potri.001G373000	0.23763	X
Potri.014G160400	0.236083
Potri.005G109400	0.232914
Potri.005G012000	0.227921
Potri.003G162800	0.222115
Potri.001G300700	0.220347
Potri.005G184700	0.219613
Potri.008G020100	0.213294	X
Potri.004G223300	0.213236
Potri.010G056600	0.208742
Potri.004G219100	0.190148
XLOC_063378	0.182827

## Sheet: Table S6
Xylem systems genetics analysis reveals a key regulator of lignin biosynthesis in Populus deltoides
Table S6 - Local-SNPs regulating the expression of Myb125
SNP	Alleles	MAF	Chr	Location (bp)	Location	SNP Effect	p-value	FDR
SNP 1	T/C	0.24	3	13769070	Exon 2	Synonymous	2.1 x 10-9	6.2 x 10-6
SNP 2	T/C	0.07	3	13769229	Exon 2	Synonymous	2.4 x 10-6	3.2 x 10-3
SNP 3	T/C	0.22	3	13769271	Exon 2	Synonymous	4.0 x 10-10	1.4 x 10-6
SNP 4	G/A	0.22	3	13769383	Exon 2	Non-synonymous	1.0 x 1 0-9	3.2 x 10-6
SNP 5	G/T	0.23	3	13769520	3'-UTR	-	6.2 x 10-11	2.6 x 10-7

## Sheet: Table S7
Xylem systems genetics analysis reveals a key regulator of lignin biosynthesis in Populus deltoides
Table S7 - Pairwise linkage disequilibrium among the SNPs located within Myb125
V3	V7	R2
Chr03:13769070	Chr03:13769229	0.280292
Chr03:13769070	Chr03:13769271	0.973395
Chr03:13769070	Chr03:13769383	0.971971
Chr03:13769070	Chr03:13769388	0.0291653
Chr03:13769070	Chr03:13769444	0.541354
Chr03:13769070	Chr03:13769520	0.994651
Chr03:13769070	Chr03:13769705	0.0258304
Chr03:13769229	Chr03:13769271	0.262771
Chr03:13769229	Chr03:13769383	0.271256
Chr03:13769229	Chr03:13769388	0.00832641
Chr03:13769229	Chr03:13769444	0.00540868
Chr03:13769229	Chr03:13769520	0.273732
Chr03:13769229	Chr03:13769705	0.00805553
Chr03:13769271	Chr03:13769383	0.988197
Chr03:13769271	Chr03:13769388	0.0286765
Chr03:13769271	Chr03:13769444	0.57009
Chr03:13769271	Chr03:13769520	0.971711
Chr03:13769271	Chr03:13769705	0.0218032
Chr03:13769383	Chr03:13769388	0.0286828
Chr03:13769383	Chr03:13769444	0.538693
Chr03:13769383	Chr03:13769520	0.976285
Chr03:13769383	Chr03:13769705	0.0237468
Chr03:13769388	Chr03:13769444	0.0145724
Chr03:13769388	Chr03:13769520	0.030293
Chr03:13769388	Chr03:13769705	0.00603124
Chr03:13769444	Chr03:13769520	0.543841
Chr03:13769444	Chr03:13769705	0.0140683
Chr03:13769520	Chr03:13769705	0.0257437

## Sheet: Table S8
Xylem systems genetics analysis reveals a key regulator of lignin biosynthesis in Populus deltoides
Table S8 - Posterior heritability (h2, 95% credibility region) and proportion of the total genetic variance (95% credibility region) explained by the MYB215’s cis-regulators for each trait.
Trait	h2	Proportion
Lignin	0.2698 (0.2680-0.2716)	0.0579 (0.0569-0.0589)
Potri.001G036900	0.2513 (0.2495-0.2531)	0.0767 (0.0755-0.0779)
Potri.003G059200	0.3153 (0.3131-0.3175)	0.0483 (0.0473-0.0493)
Potri.005G117500	0.3450 (0.3428-0.3472)	0.0826 (0.0814-0.0838)
Potri.006G033300	0.2417 (0.2401-0.2433)	0.0694 (0.0682-0.0706)
Potri.008G038200	0.3768 (0.3744-0.3792)	0.0671 (0.0659-0.0683)
Potri.009G099800	0.2163 (0.2149-0.2177)	0.0871 (0.0857-0.0885)
Potri.010G224100	0.3124 (0.3104-0.3144)	0.0754 (0.0742-0.0766)
Potri.012G006400	0.2492 (0.2474-0.2510)	0.0631 (0.0619-0.0643)
Potri.013G157900	0.2282(0.2266-0.2298)	0.0709 (0.0697-0.0721)

## Sheet: Table S9
Xylem systems genetics analysis reveals a key regulator of lignin biosynthesis in Populus deltoides
Table S9 - Primer sequences
Primer	Sequence 5'->3'
Potri.003G059200_FWD	GCTGCTACATGGGCGACATG	RT-qPCR
Potri.003G059200_REV	CTAGTCCGCCCATTGACTCG
Potri.006G033300_FWD	CACTCATCCTGAAAACAATGG
Potri.006G033300_REV	TCTAGCCCTTGCTCATCCATA
Potri.009G099800_FWD	AGCTTAAGTGGGATGTCTGTGC
Potri.009G099800_REV	TCTATTGCTGTTACCTGGCCATC
Potri.012G006400_FWD	CATCTTATCCCGGAGTGGA
Potri.012G006400_REV	ACAAGTATCACCTTGCCGT
Potri.013G157900_FWD	GATGAGAGGAAGAAACTTGCA
Potri.013G157900_REV	GTGTTGTCTCAATTGCAGCGA
Potri.003G114100_FWD	ATGCTCGTCTTGGCAATAGGTG
Potri.003G114100_REV	AGATCAGCAGGAGATGATGAGCT
Potri.010G224100_FWD	TACACAAGCTGGGATTGATG
Potri.010G224100_REV	AGGTGATCAGTAAACTCAGGT
Potri.001G036900_FWD	ACAAGTAGATGGAGACAATCCTAACCTG
Potri.001G036900_REV	CTGGTGCTATAGATACCTTGTACTTC
Potri.005G117500_FWD	TAGACCAGCCAACATAGCCATA
Potri.005G117500_REV	GCTTGCCTATATTGGATTCAACTGTCTTAAC
Potri.008G038200_FWD	CAAGGTAGAGCTGTCAGAGGA
Potri.008G038200_REV	TGCCATTACCAAAGATACCAGCATTC
Pt_Myb125_FWD	AATGGTCTCAAATGGGAAGGCAACCTTGCTGTGA	Cloning Myb125
Pt_Myb125_REV	ATTGGTCTCTAAGCCTAGCGATTGAGTTCCATCTCTAATATGTTAAGTGCG
